# Supplementary material for: Novel practical stereoselective synthesis of a bicyclic hydantoino-thiolactone as the key intermediate for production of (+)-biotin
Source: PubMed Central journal article supplement — RSC Adv. 2023 Sep 4;13(37):26160–8. doi: 10.1039/d3ra04721k (PMC10475979; doi:10.1039/d3ra04721k), 2023-09-04
Supplement: RA-013-D3RA04721K-s001.pdf [file RA-013-D3RA04721K-s001.pdf]

# Supporting Information

## Novel Practical Stereoselective Synthesis of a Bicyclic Hydantointhiolactone as the Key Intermediate for Production of (+)-Biotin

Lei Shu,<sup>a</sup> Zhi-Wei Yang,<sup>a</sup> Ren-Xu Cao,<sup>a</sup> Xiao-Xia Qiu,<sup>a</sup> Feng Ni<sup>\*b</sup>  
and Xiao-Xin Shi<sup>\*a</sup>

<sup>a</sup> Engineering Research Center of Pharmaceutical Process Chemistry of the Ministry of Education, School of Pharmacy, East China University of Science and Technology, 130 Mei-Long Road, Shanghai 200237, P. R. China.

<sup>b</sup> Shanghai Shyndec Pharmaceutical Co., Ltd., 378 Jian-Lu Road, Shanghai 201203, P. R. China.

E-mail: xxshi@ecust.edu.cn; nifeng1@sinopharm.com

### Contents

|                                                                                                                                      |            |
|--------------------------------------------------------------------------------------------------------------------------------------|------------|
| <sup>1</sup> H and <sup>13</sup> C NMR Spectra of Compounds <b>2</b> , <b>3</b> , <b>5-10</b> and <b>1</b> .                         | page 1-12  |
| HR MS (ESI) Spectra of Compounds <b>5-10</b> and <b>1</b> .                                                                          | page 13-16 |
| <sup>1</sup> H- <sup>1</sup> H COSY and <sup>1</sup> H- <sup>1</sup> H NOESY Spectra of Compounds <b>5</b> , <b>9</b> and <b>1</b> . | page 17-24 |
| X-ray Crystal Structure and Crystallographic Data of Compound <i>cis</i> - <b>1</b> .                                                | page 25-35 |

# <sup>1</sup>H and <sup>13</sup>C NMR Spectra of Compound 2

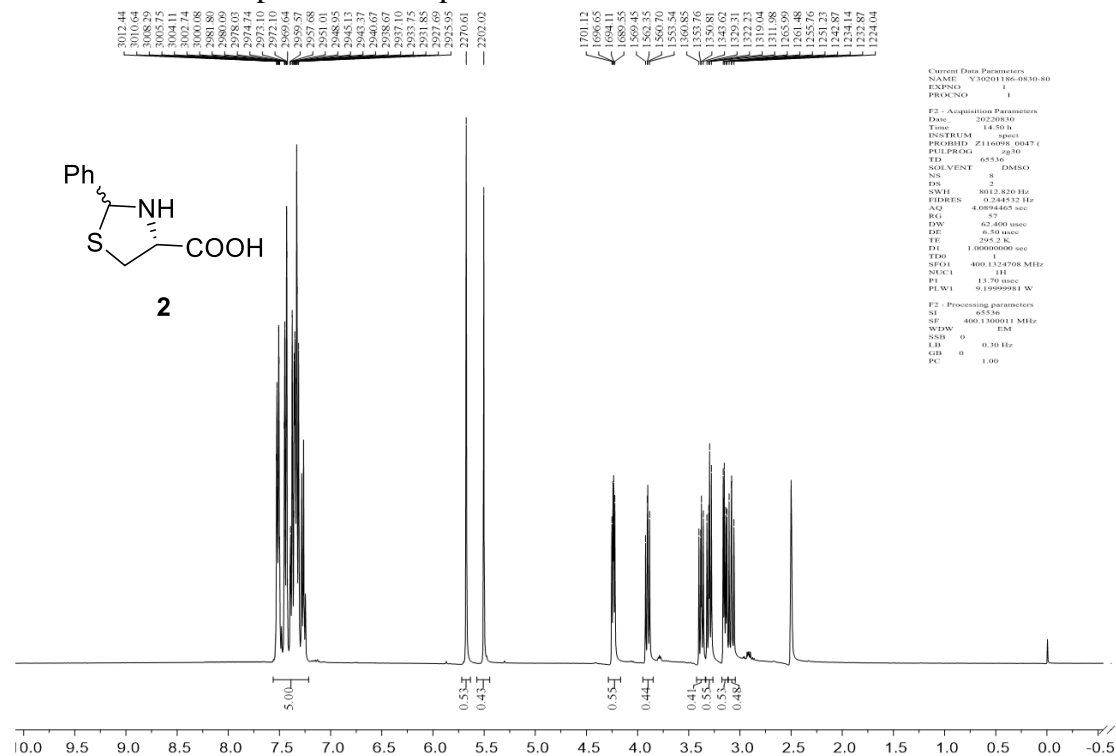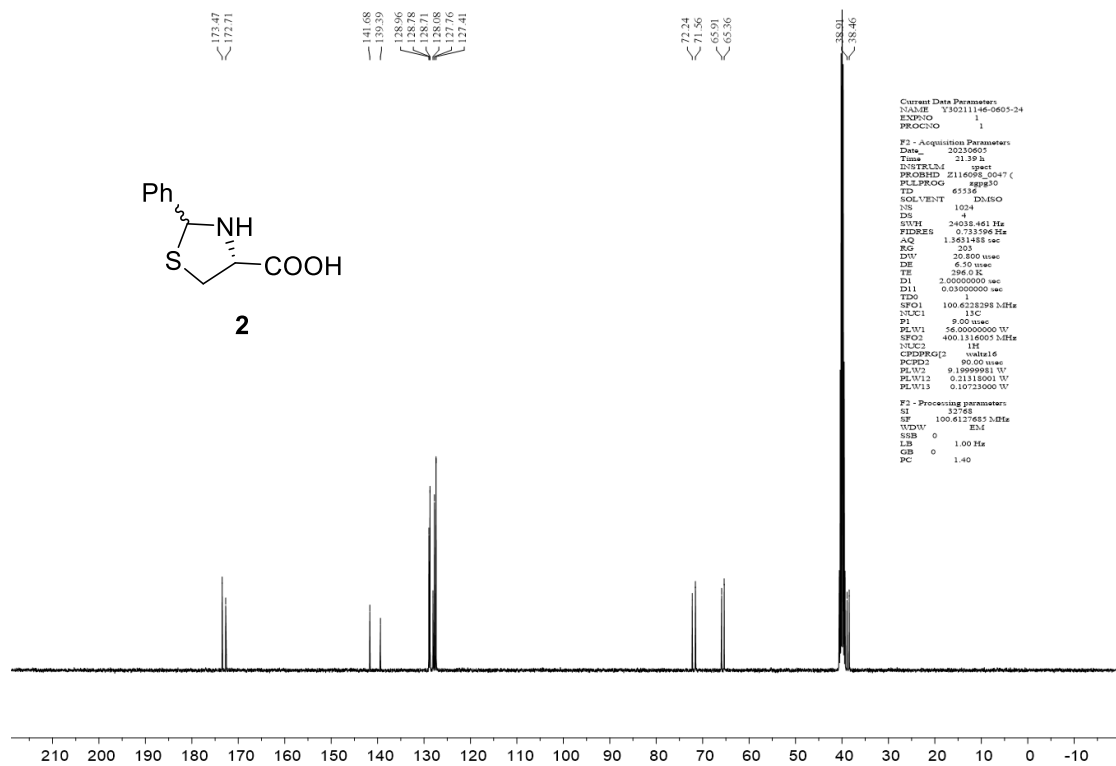

# <sup>1</sup>H and <sup>13</sup>C NMR Spectra of Compound 3

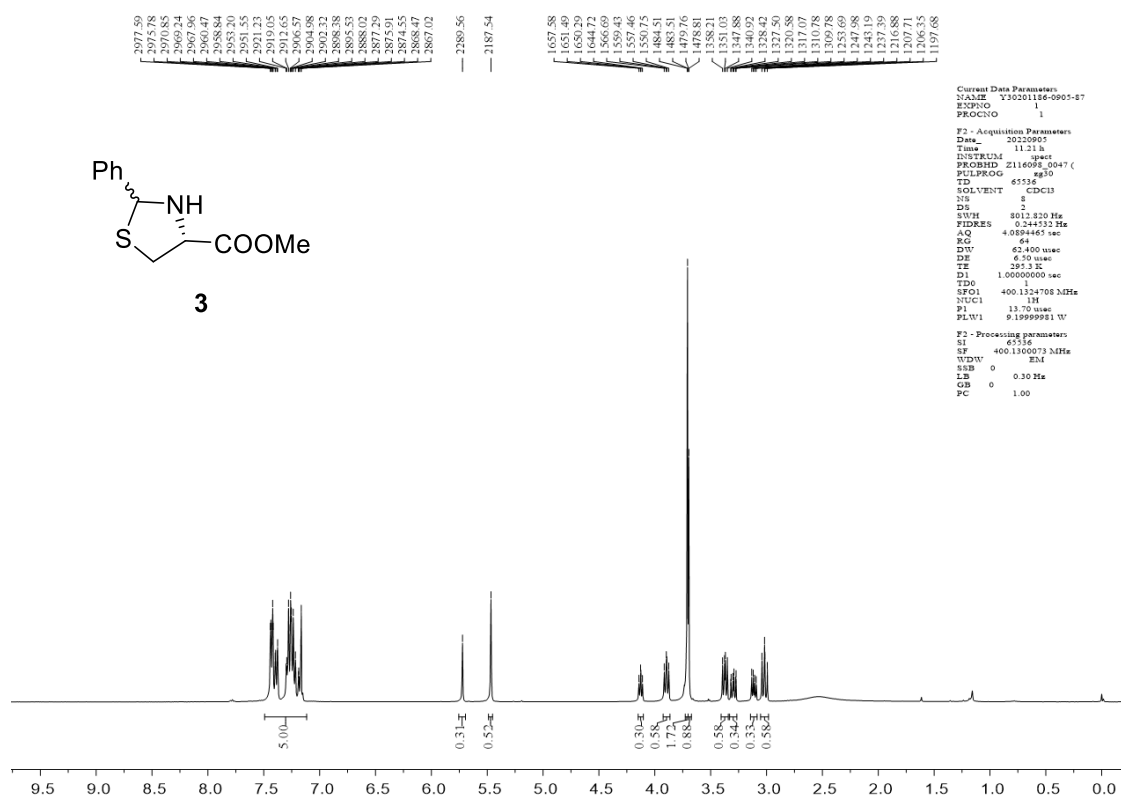

Figure S3. <sup>1</sup>H NMR (CDCl<sub>3</sub>, 400 MHz) spectrum of compound 3

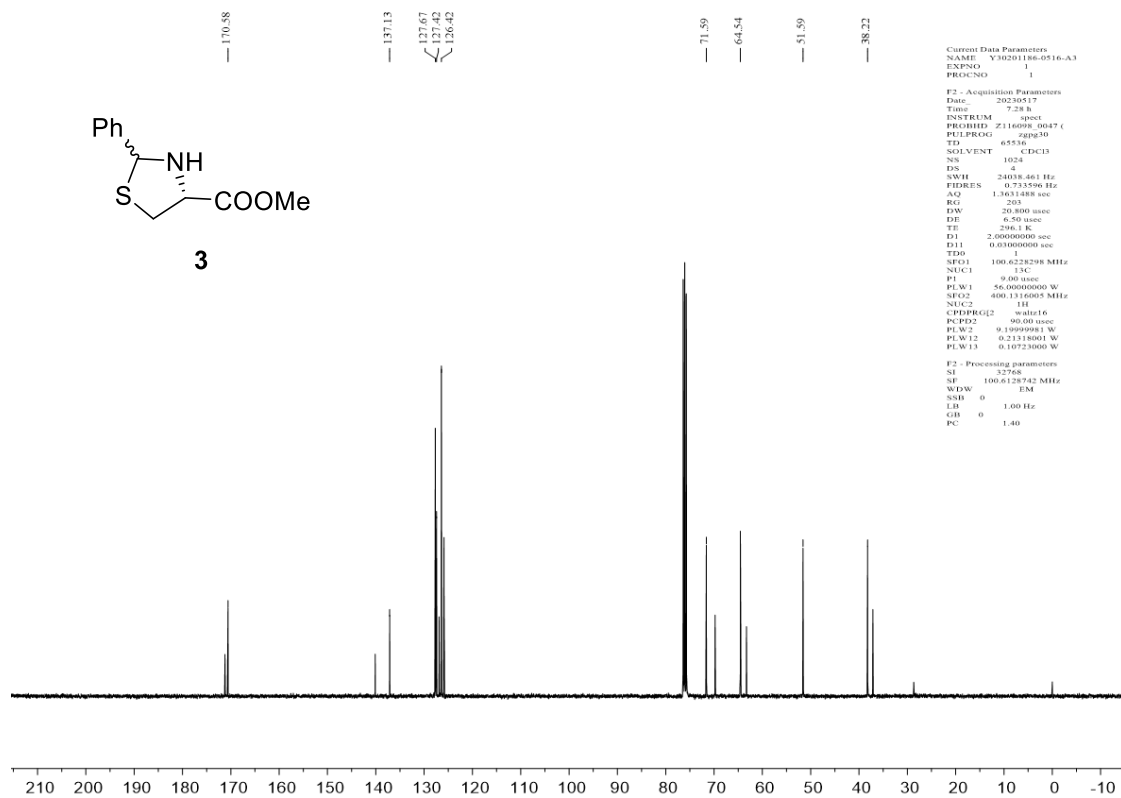

Figure S4. <sup>13</sup>C NMR (CDCl<sub>3</sub>, 101 MHz) spectrum of compound 3

# <sup>1</sup>H and <sup>13</sup>C NMR Spectra of Compound 5

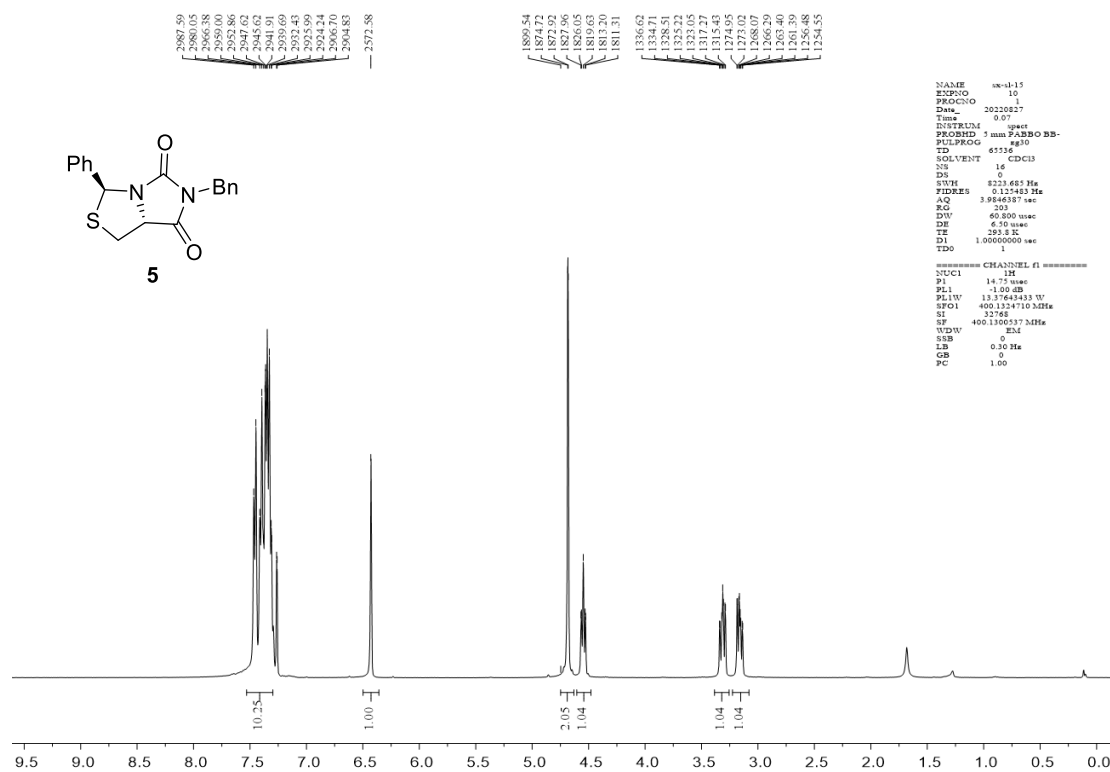

Figure S5. <sup>1</sup>H NMR (CDCl<sub>3</sub>, 400 MHz) spectrum of compound 5

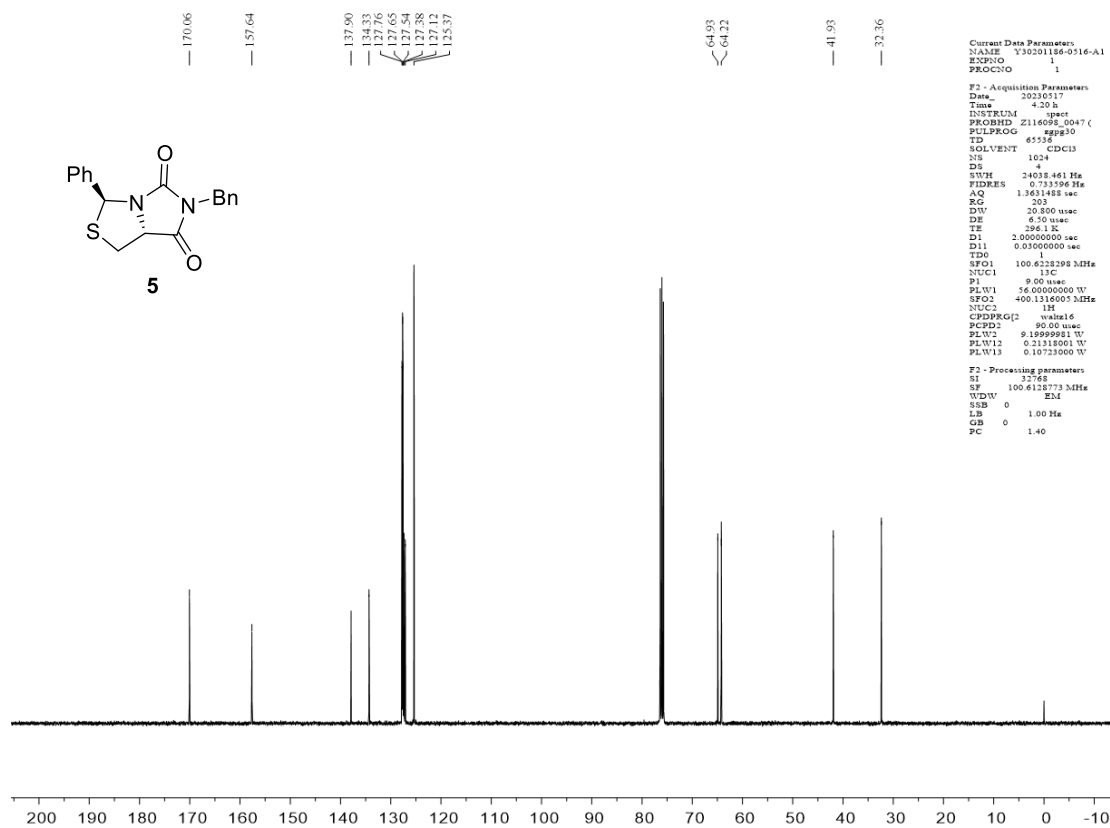

Figure S6. <sup>13</sup>C NMR (CDCl<sub>3</sub>, 101 MHz) spectrum of compound 5

# <sup>1</sup>H and <sup>13</sup>C NMR Spectra of Compound 6

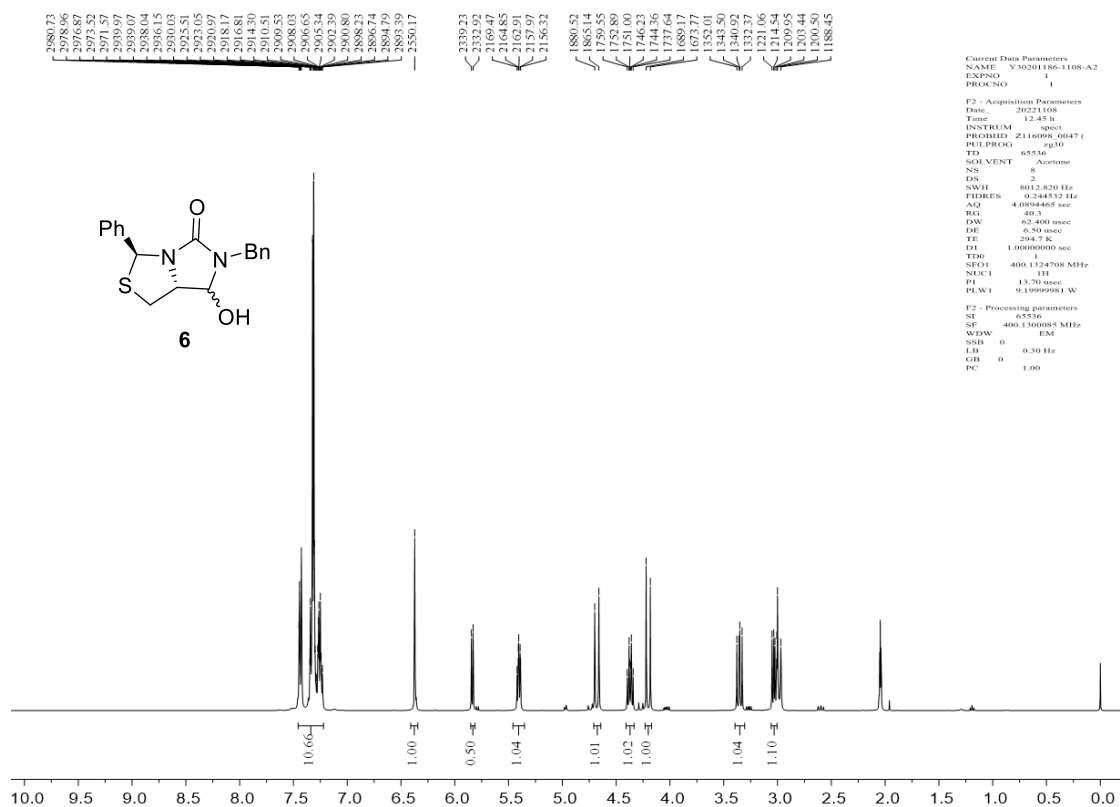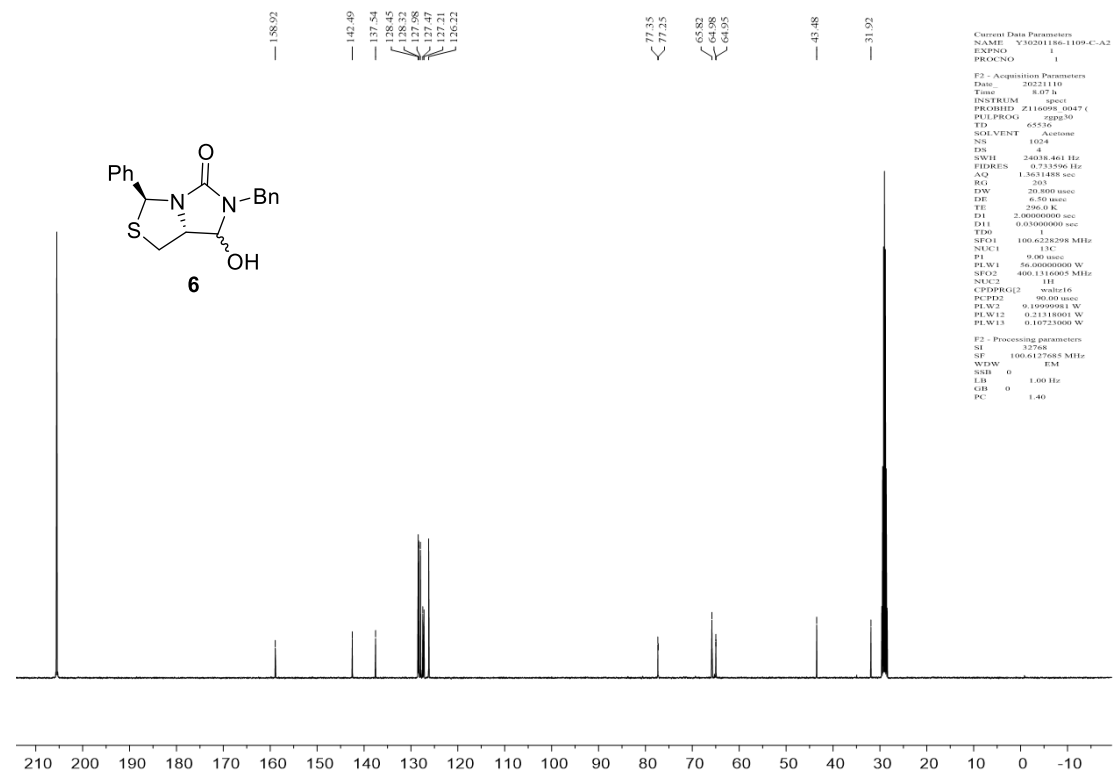

# <sup>1</sup>H and <sup>13</sup>C NMR Spectra of Compound 7

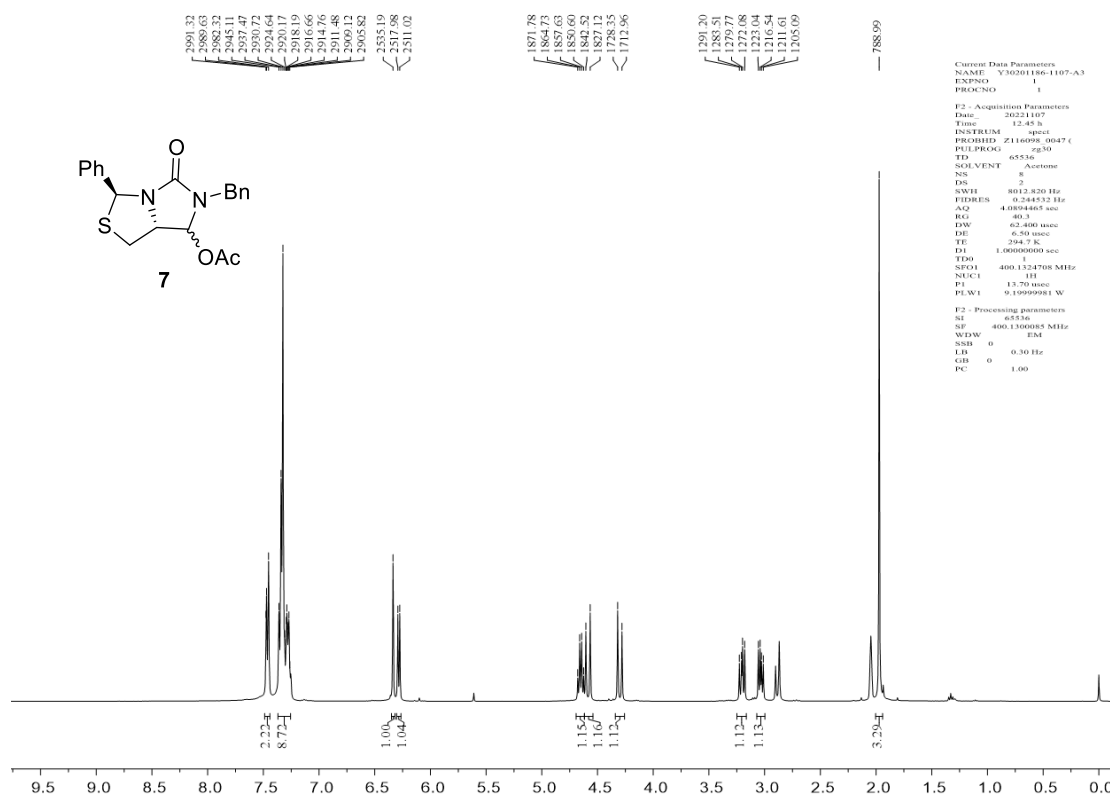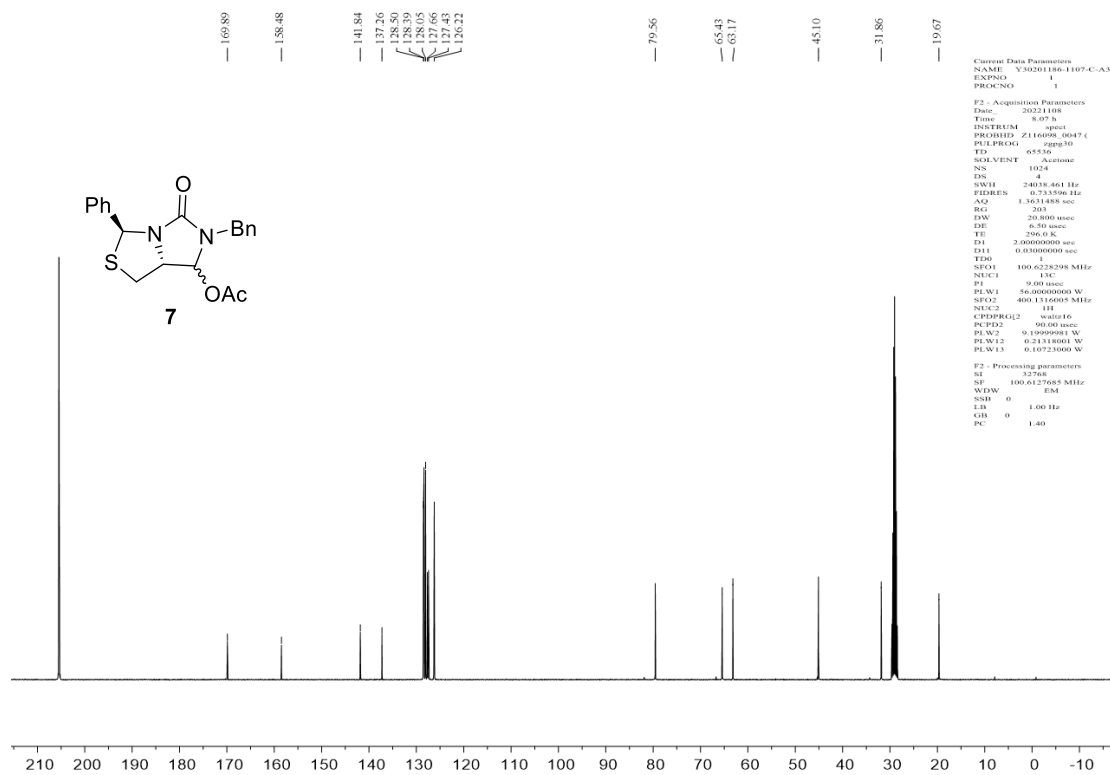

# <sup>1</sup>H and <sup>13</sup>C NMR Spectra of Major diastereomer of Compound 8

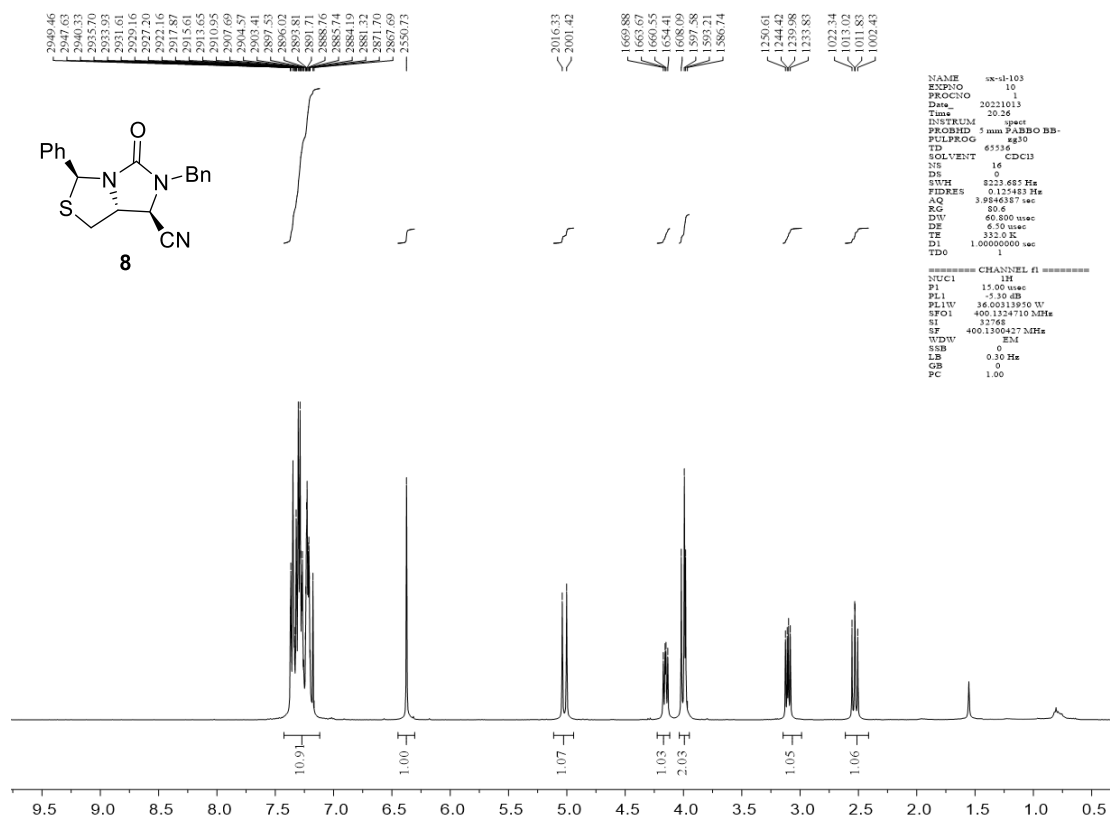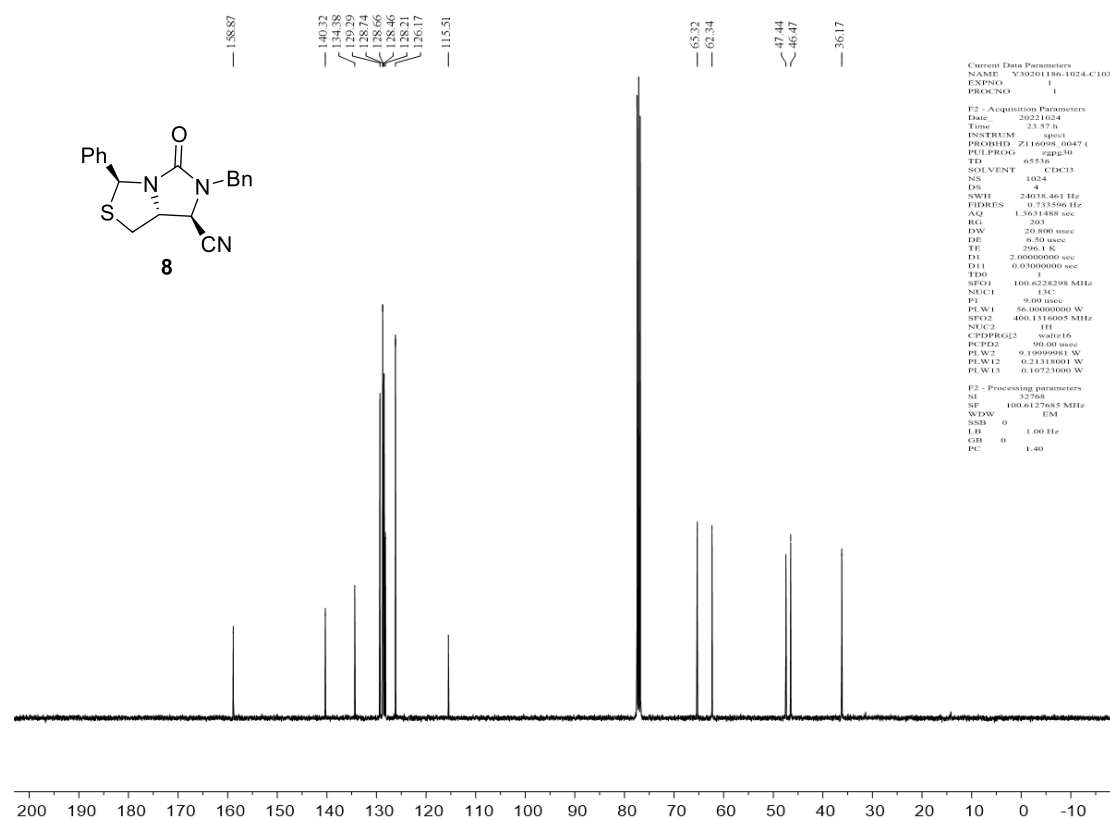

# <sup>1</sup>H and <sup>13</sup>C NMR Spectra of Minor diastereomer of Compound 8

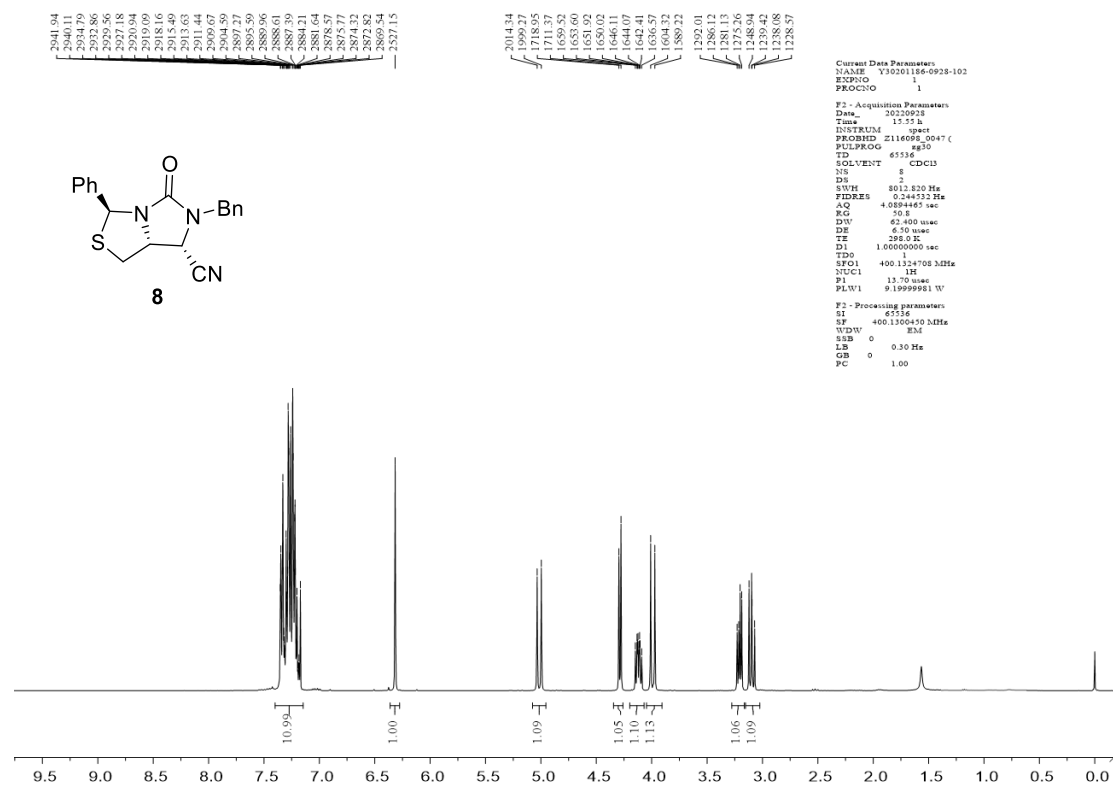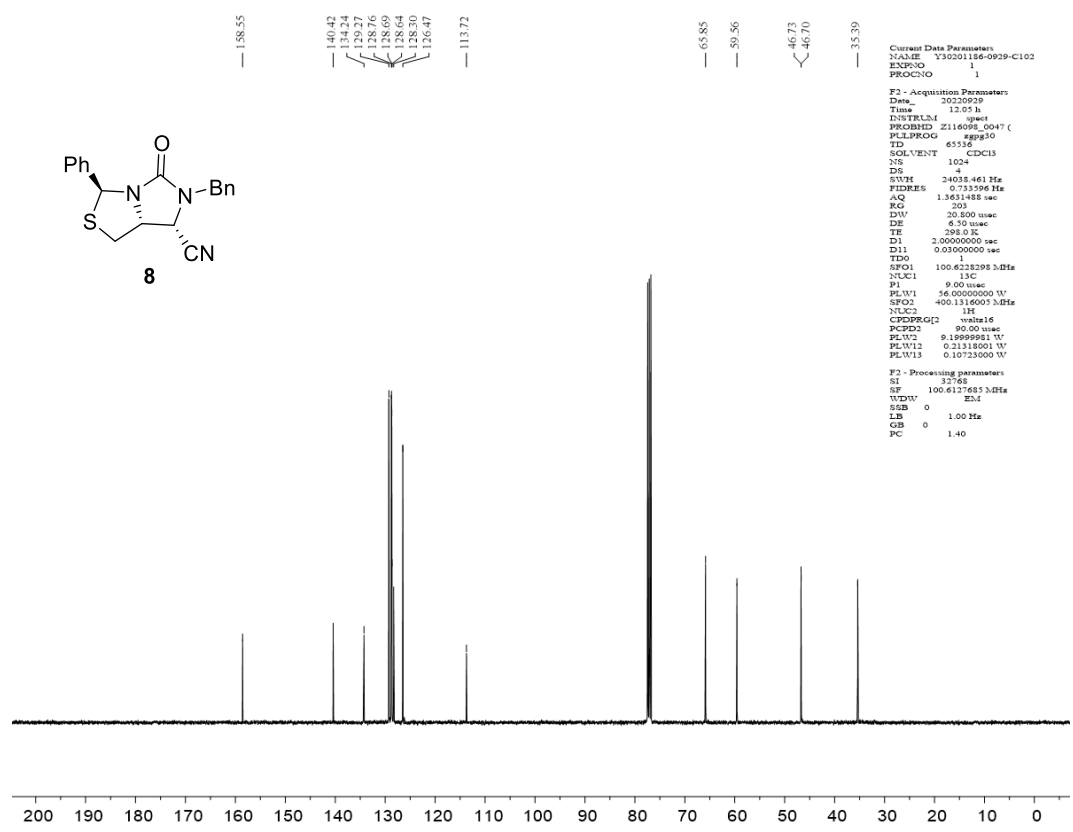



# <sup>1</sup>H and <sup>13</sup>C NMR Spectra of Compound 8a

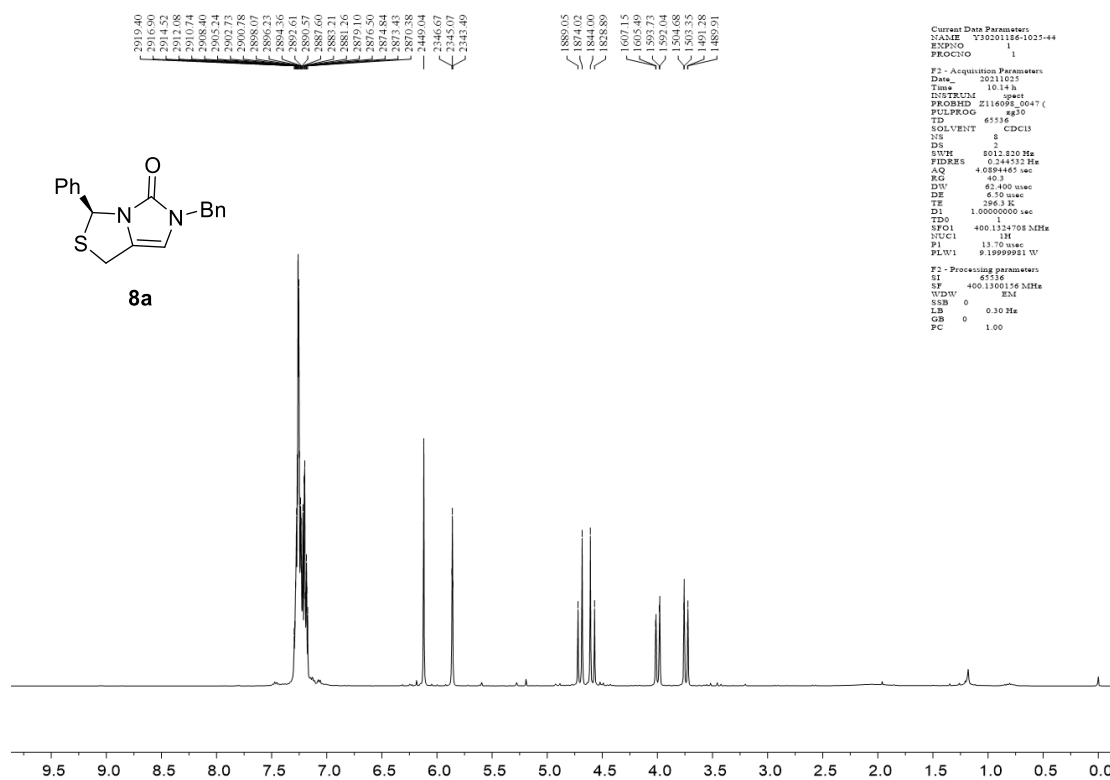

Figure S15. <sup>1</sup>H NMR (CDCl<sub>3</sub>, 400 MHz) spectrum of compound 8a

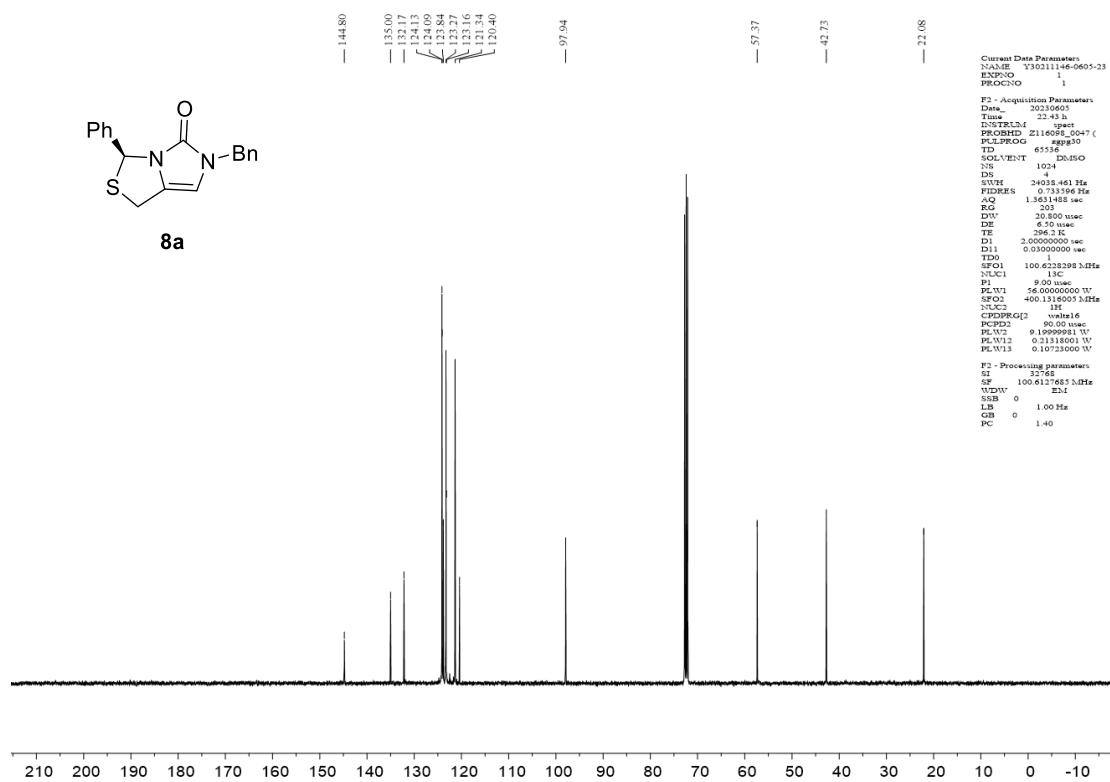

Figure S16. <sup>13</sup>C NMR (CDCl<sub>3</sub>, 101 MHz) spectrum of compound 8a

# <sup>1</sup>H and <sup>13</sup>C NMR Spectra of Compound 9

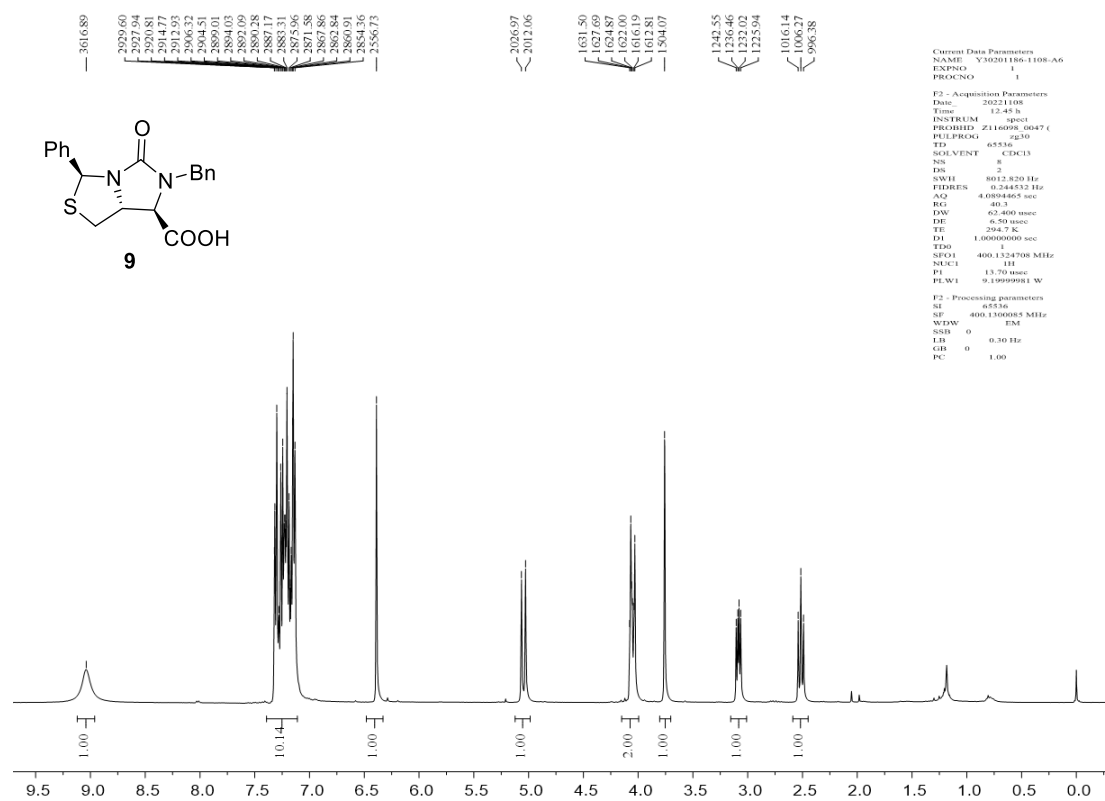

Figure S17. <sup>1</sup>H NMR (CDCl<sub>3</sub>, 400 MHz) spectrum of compound 9

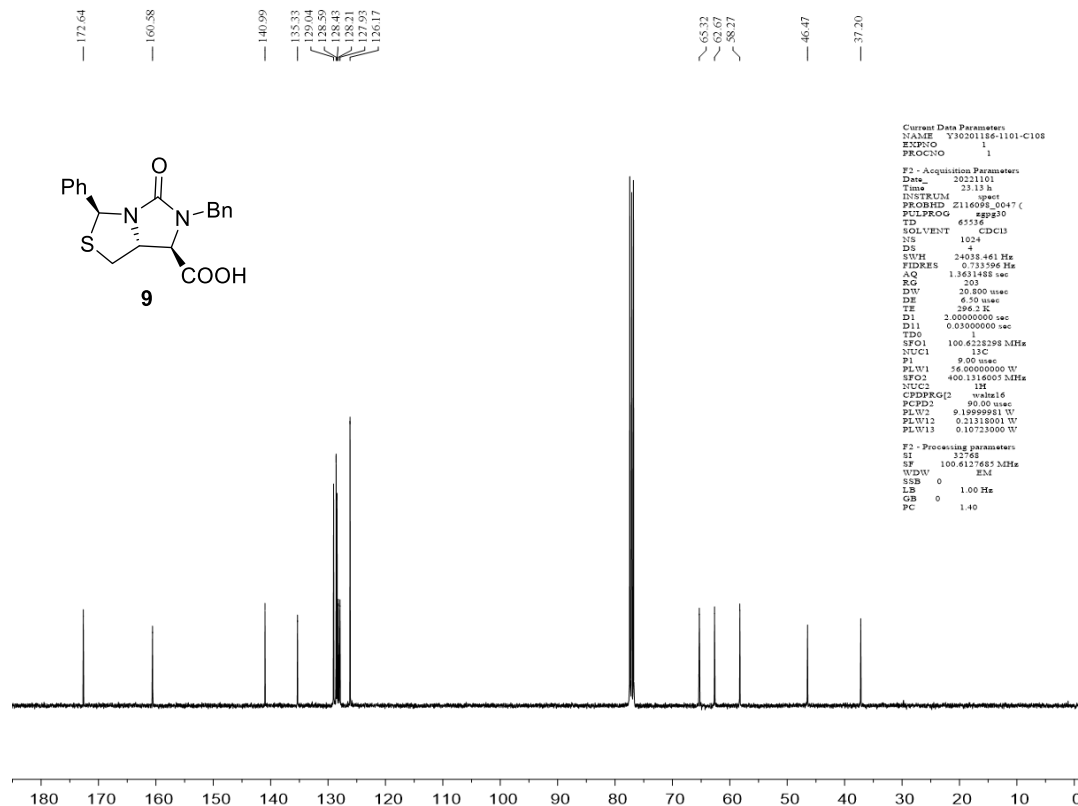

Figure S18. <sup>13</sup>C NMR (CDCl<sub>3</sub>, 101 MHz) spectrum of compound 9

# $^1\text{H}$ and $^{13}\text{C}$ NMR Spectra of Compound **10**

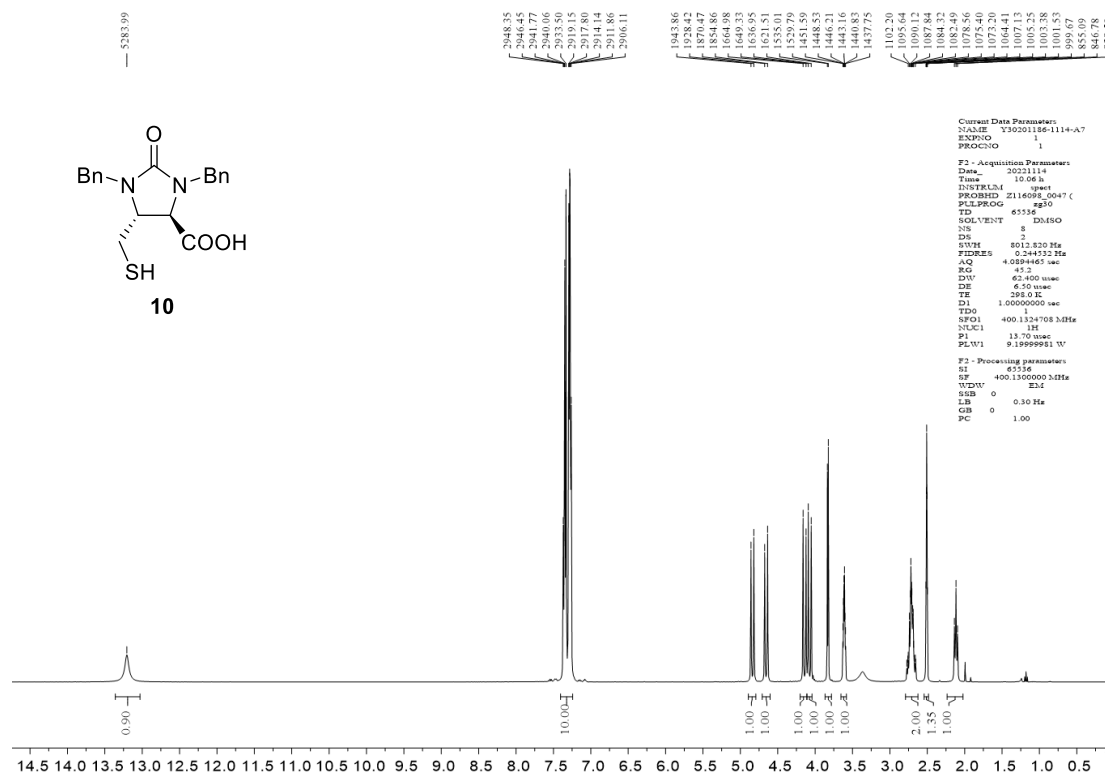

Figure S19.  $^1\text{H}$  NMR (DMSO- $d_6$ , 400 MHz) spectrum of compound **10**

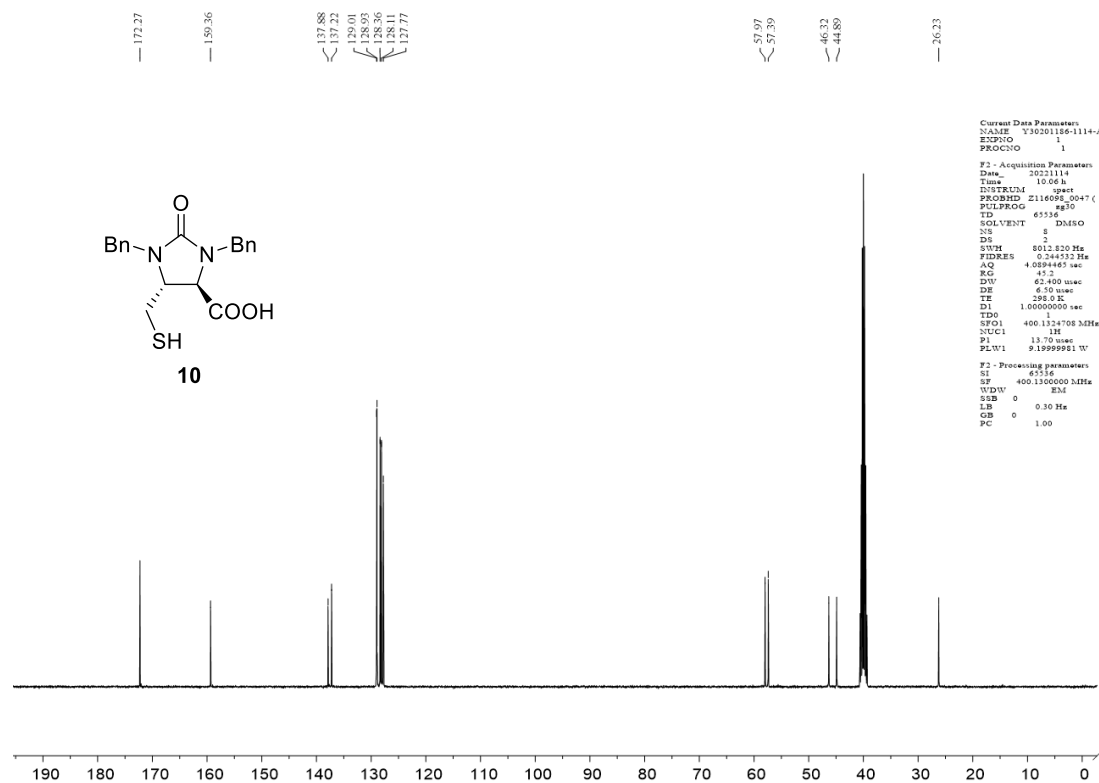

Figure S20.  $^{13}\text{C}$  NMR (DMSO- $d_6$ , 101 MHz) spectrum of compound **10**

<sup>1</sup>H and <sup>13</sup>C NMR Spectra of Compound *trans*-1

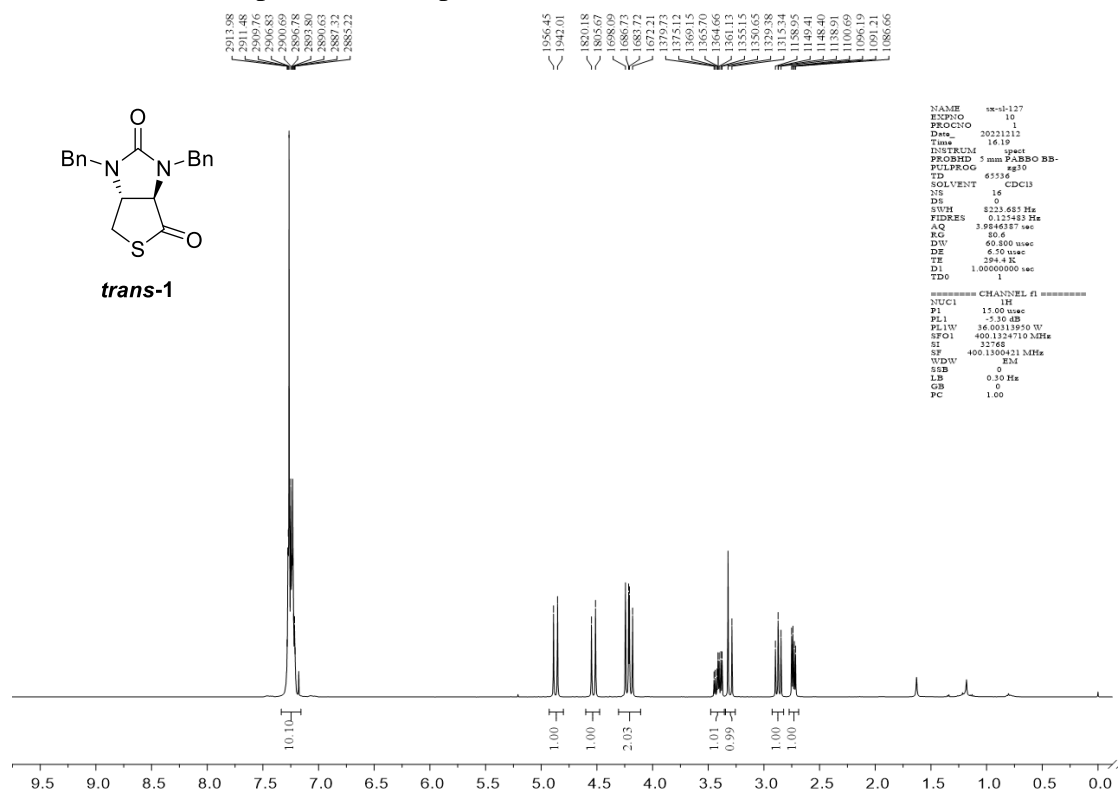

Figure S21. <sup>1</sup>H NMR (CDCl<sub>3</sub>, 400 MHz) spectrum of compound *trans*-1

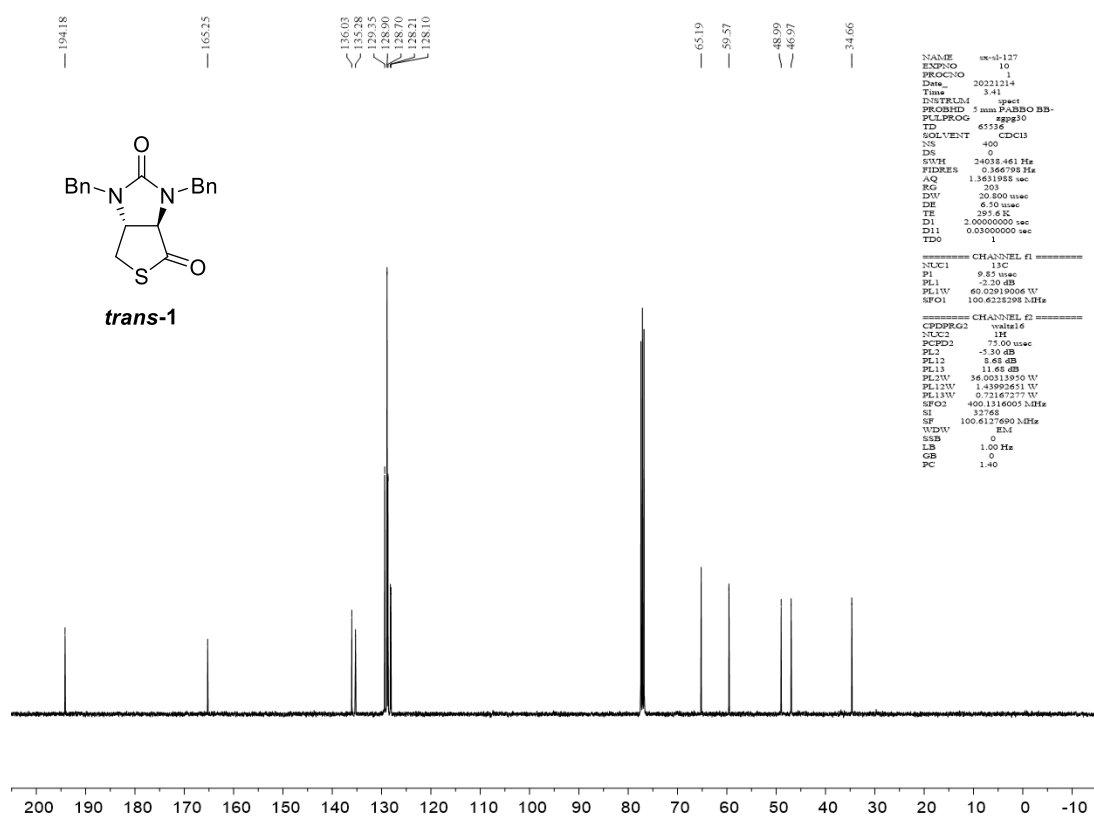

Figure S22. <sup>13</sup>C NMR (CDCl<sub>3</sub>, 101 MHz) spectrum of compound *trans*-1

# $^1\text{H}$ and $^{13}\text{C}$ NMR Spectra of Compound *cis*-1

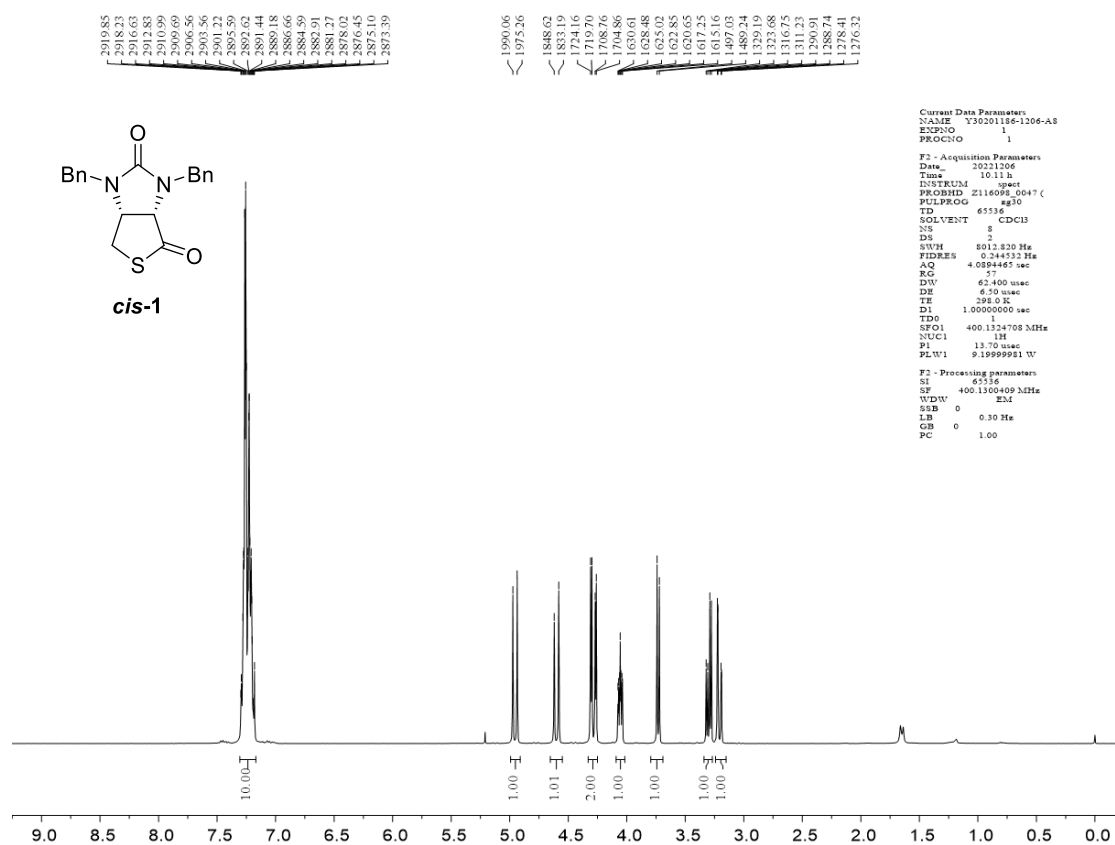

Figure S23.  $^1\text{H}$  NMR (CDCl<sub>3</sub>, 400 MHz) spectrum of compound *cis*-1

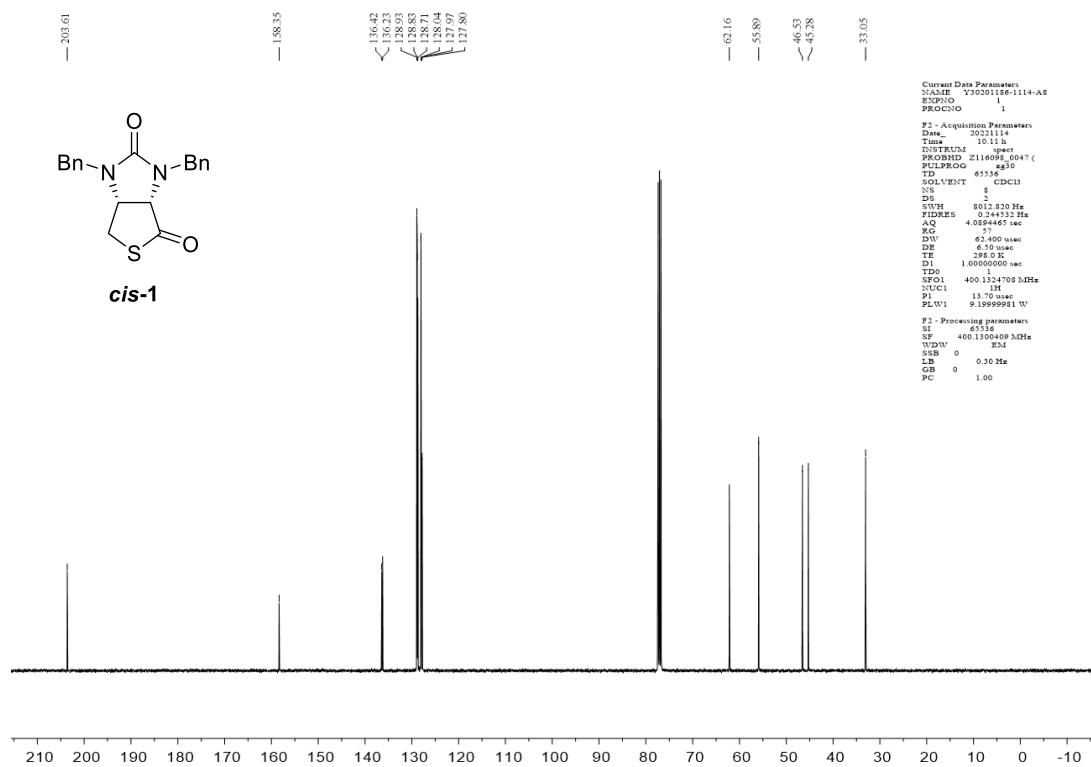

Figure S24.  $^{13}\text{C}$  NMR (CDCl<sub>3</sub>, 101 MHz) spectrum of compound *cis*-1

# HR MS (ESI) Spectra of Compounds 5-10 and 1

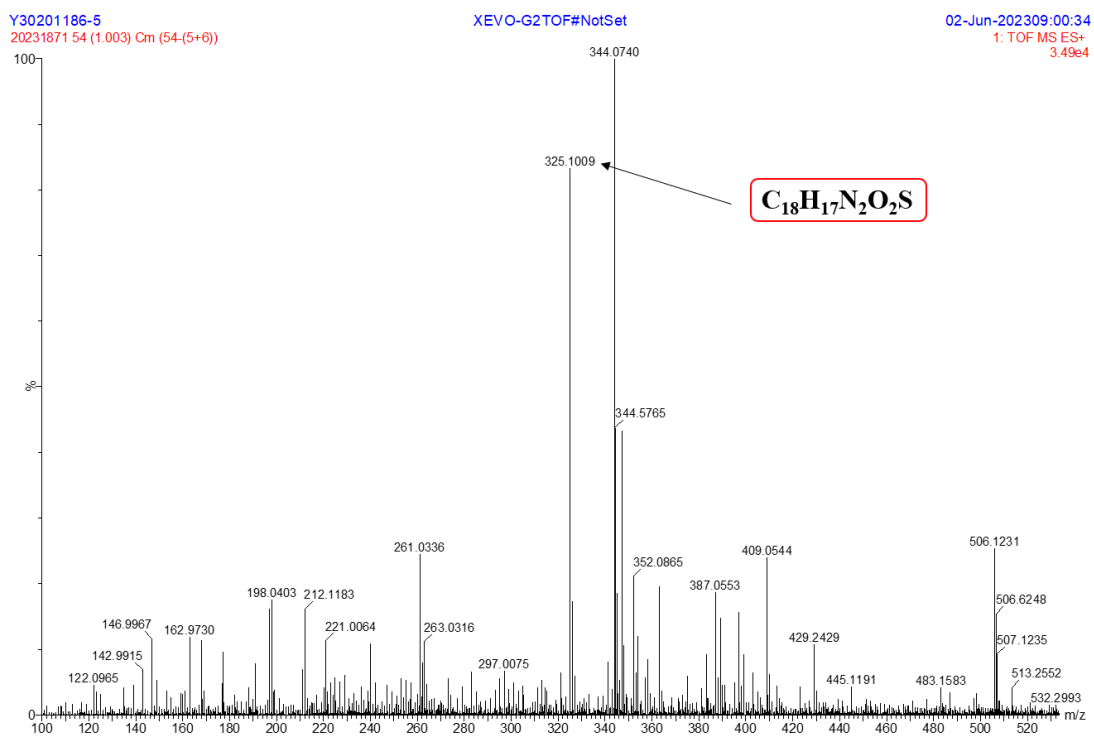

Figure S25. ESI Spectra of compound 5

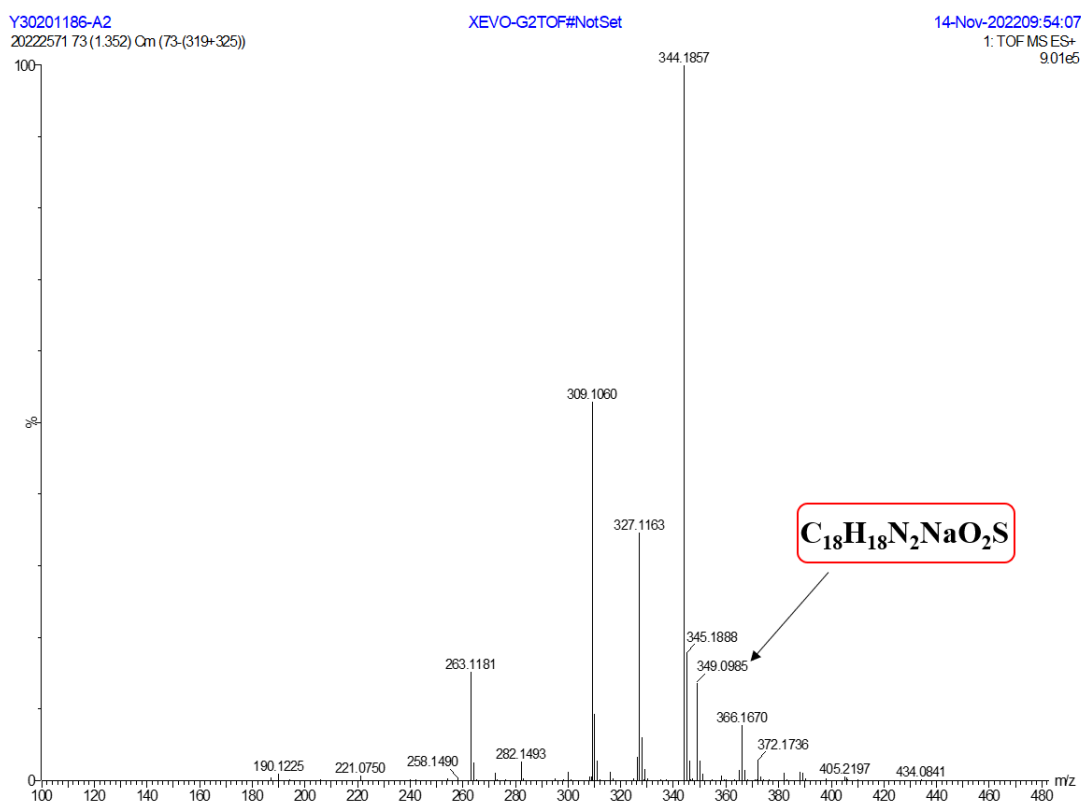

Figure S26. ESI Spectra of compound 6

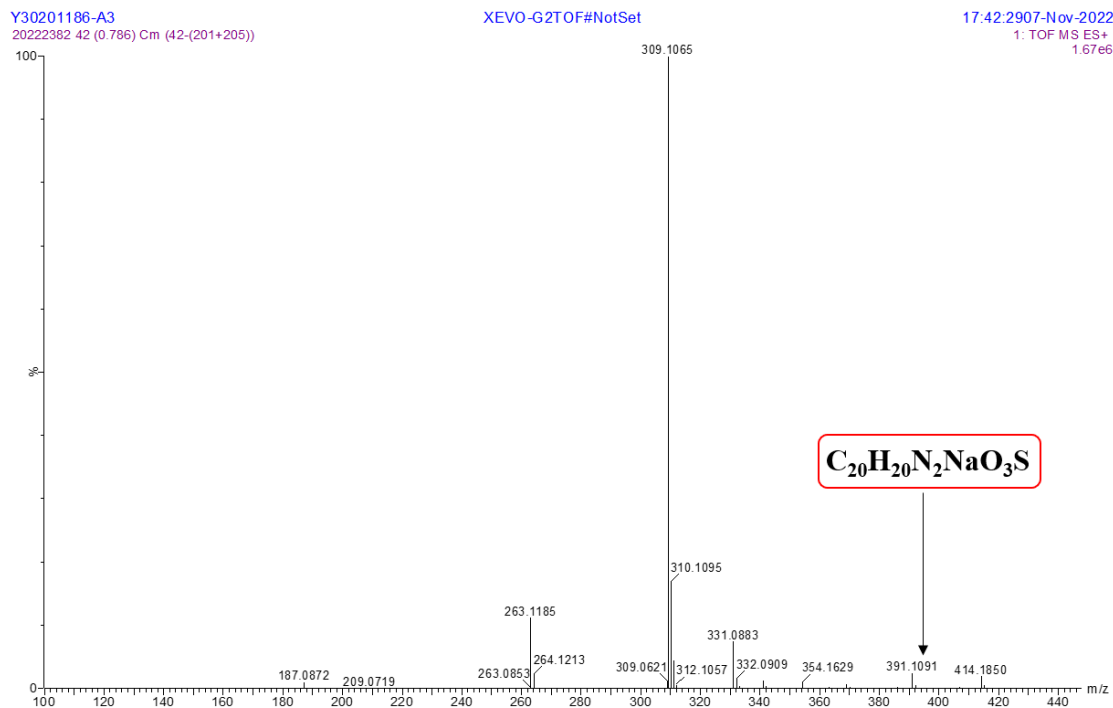

Figure S27. ESI Spectra of compound 7

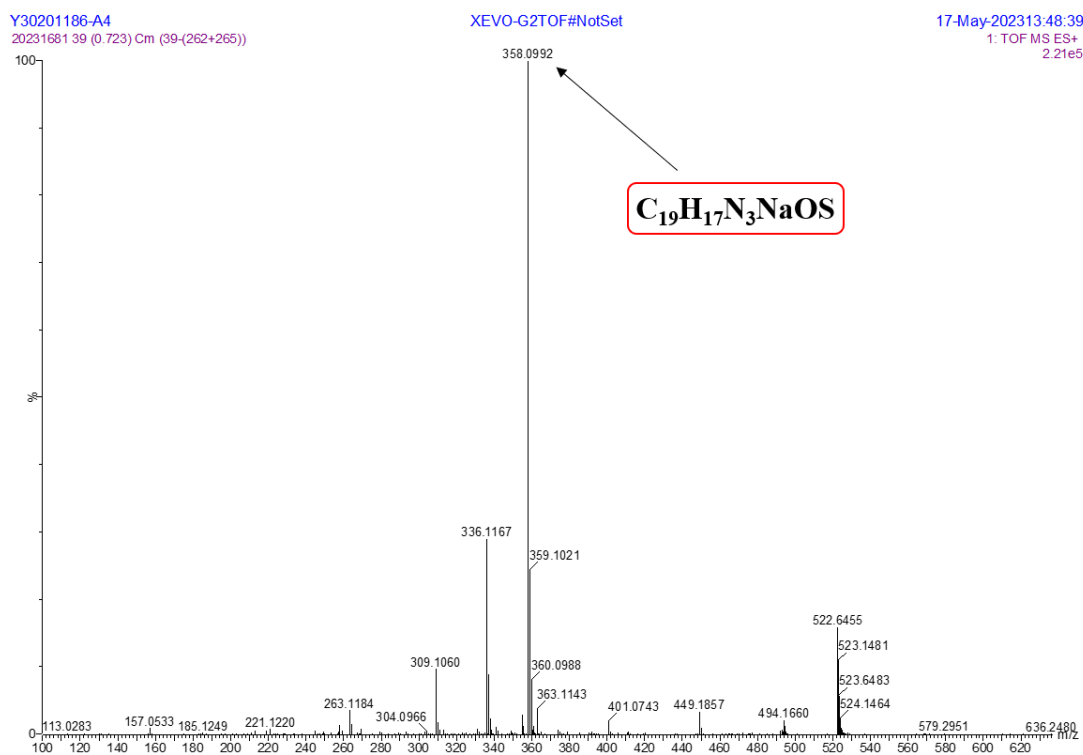

Figure S28. ESI Spectra of compound 8

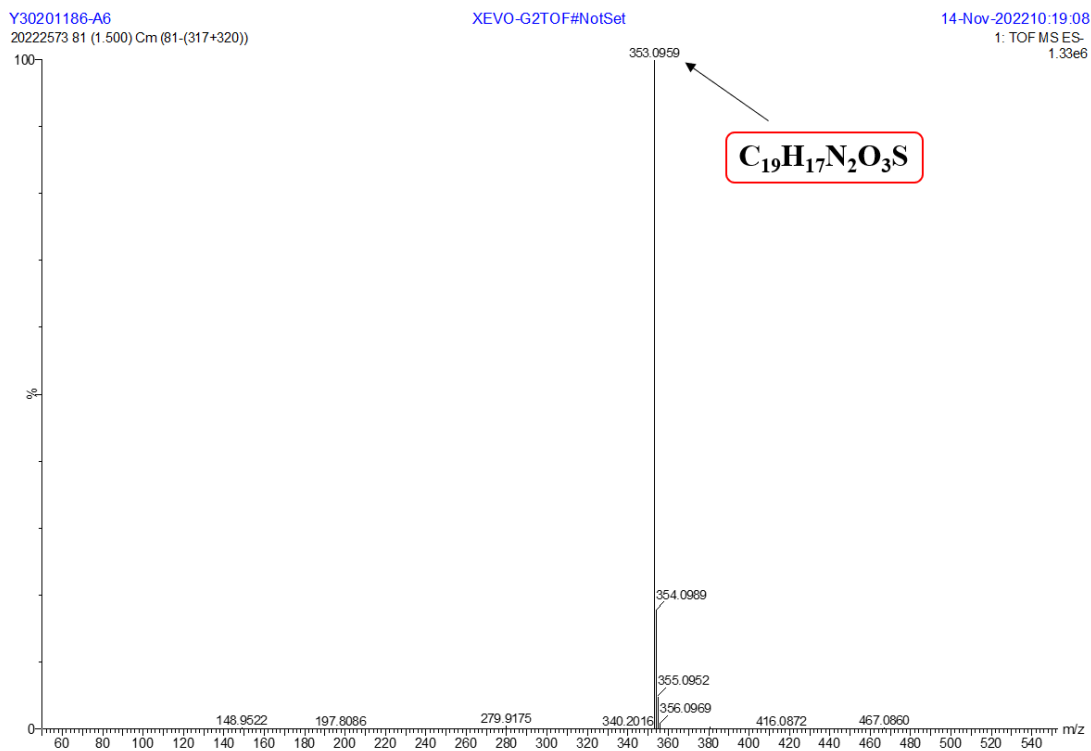

**Figure S29. ESI Spectra of compound 9**

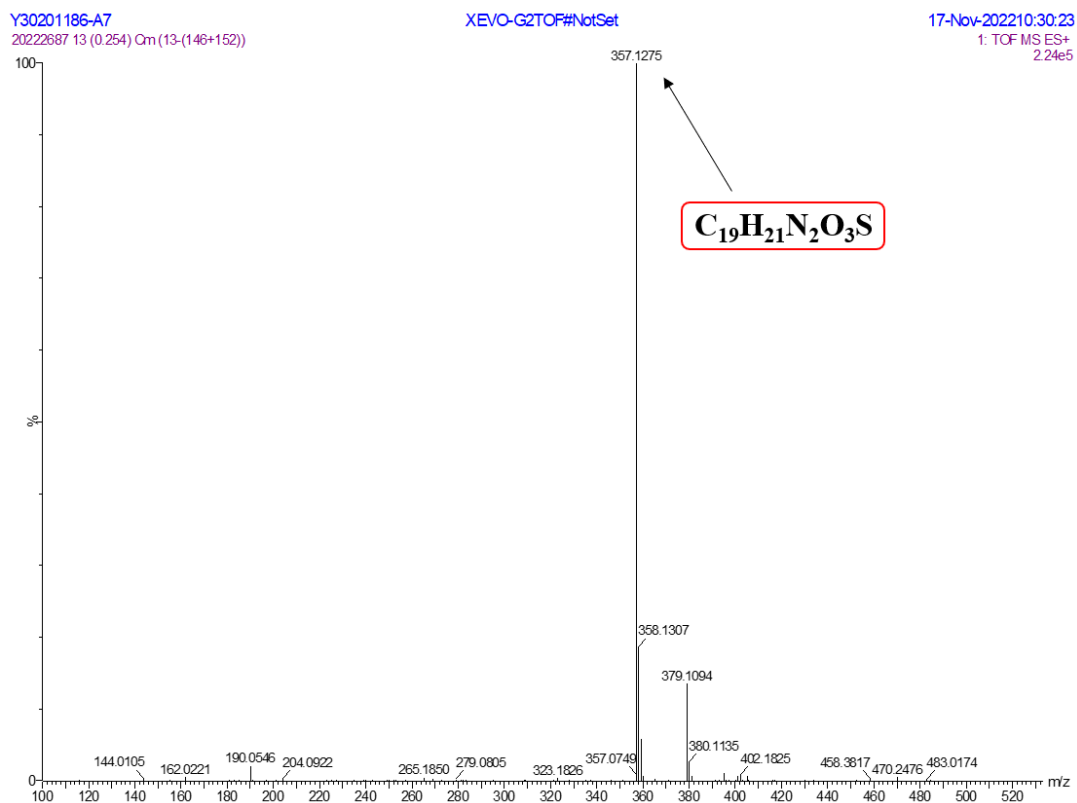

**Figure S30. ESI Spectra of compound 10**



Y30201186-A8  
20222688 39 (0.723) Cm (39-(166:167+184:185))

XEVO-G2TOF#NotSet

17-Nov-2022 10:37:39  
1: TOF MS ES+  
4.57e5

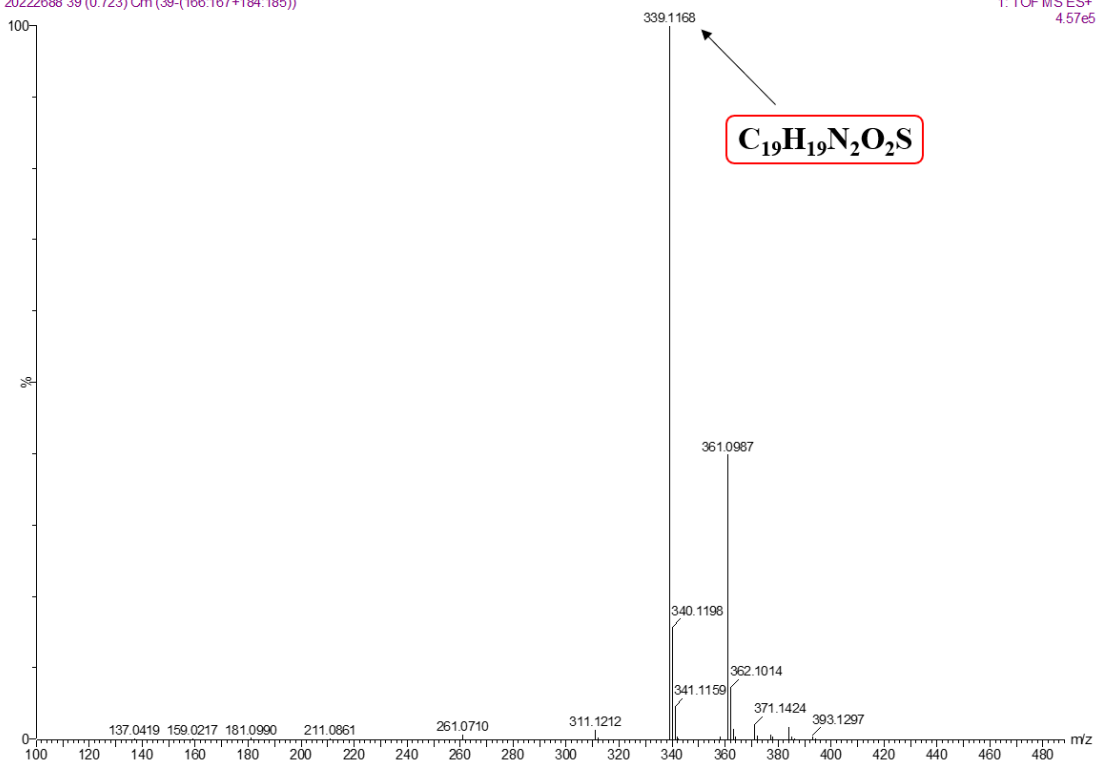

Figure S31. ESI Spectra of compound **1**

$^1\text{H}$ - $^1\text{H}$  COSY and  $^1\text{H}$ - $^1\text{H}$  NOESY Spectra of Compound 5

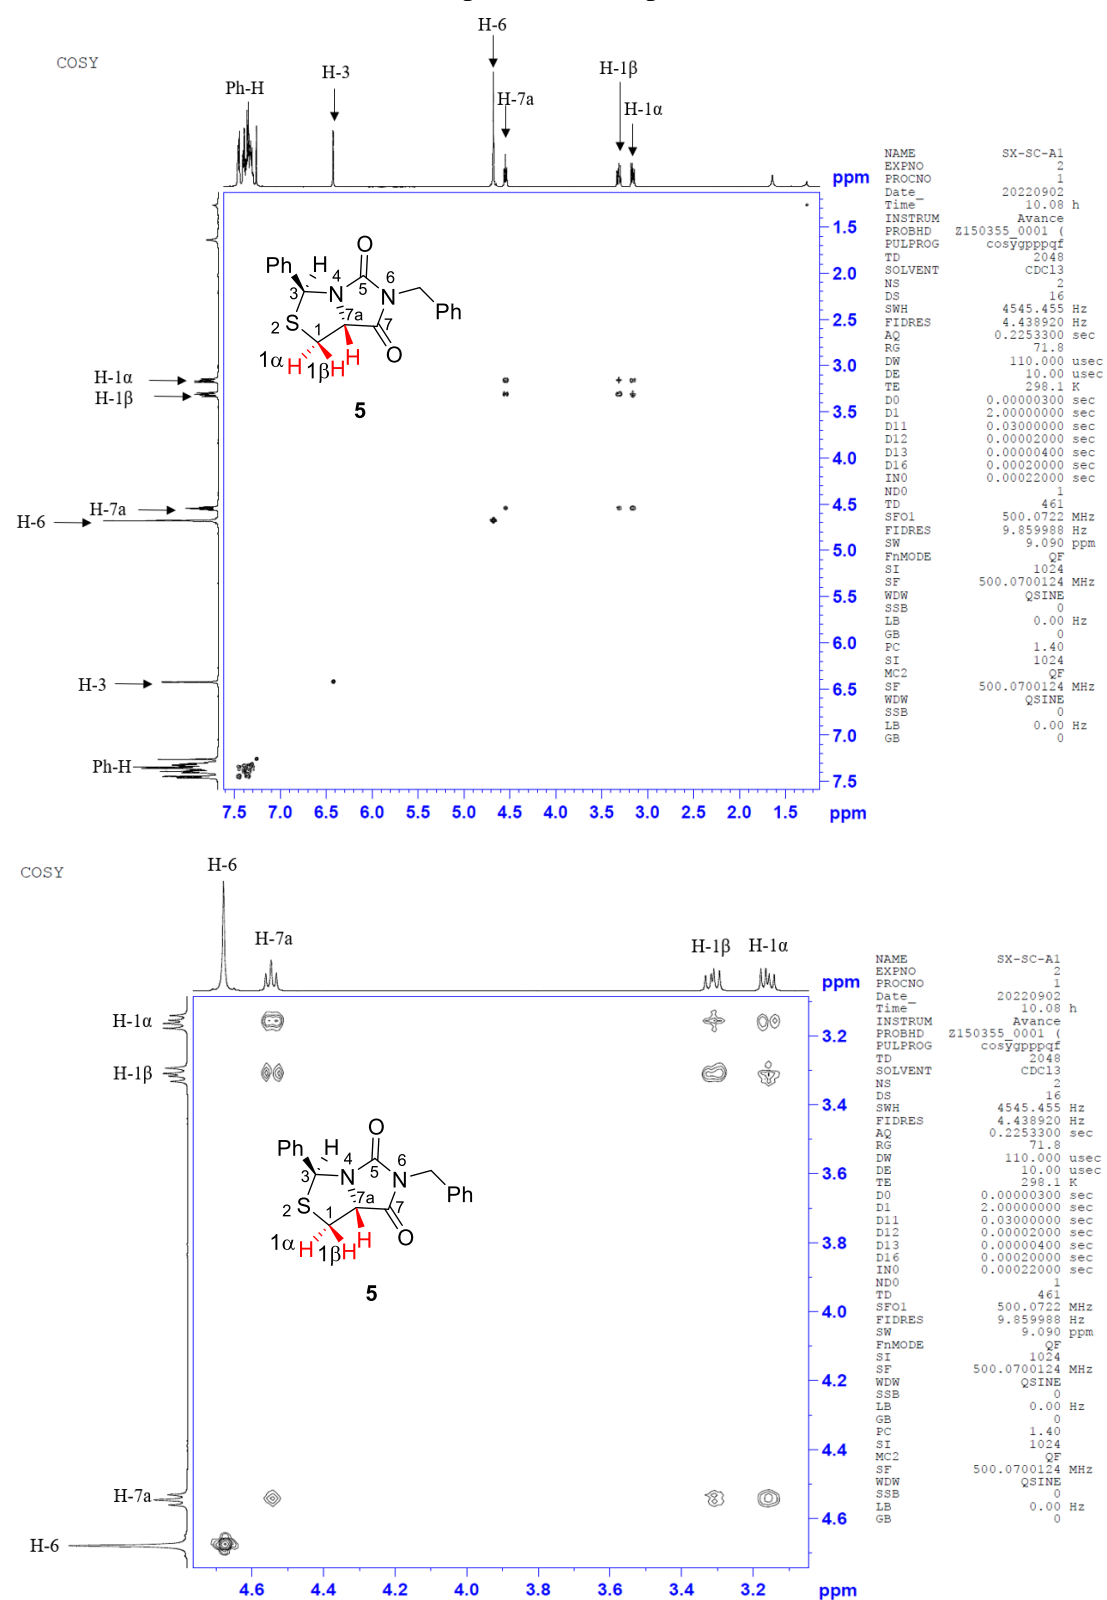

Figure S32.  $^1\text{H}$ - $^1\text{H}$  COSY spectrum of compound 5

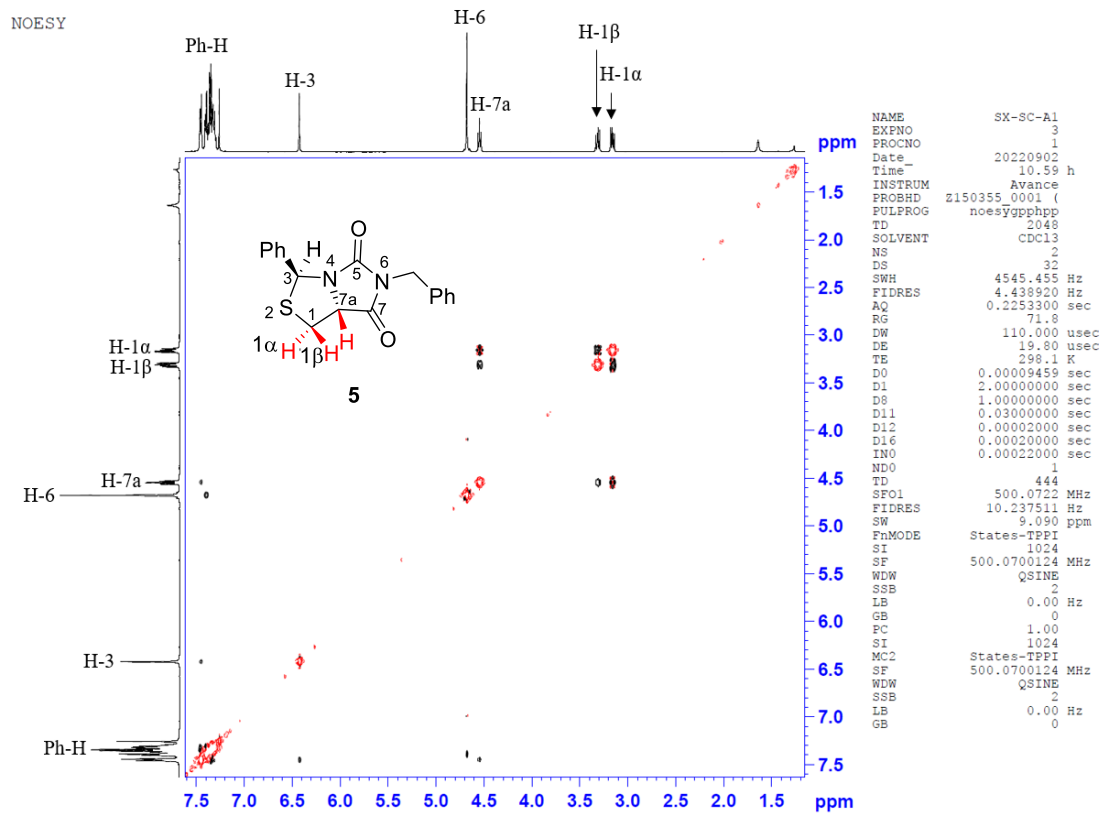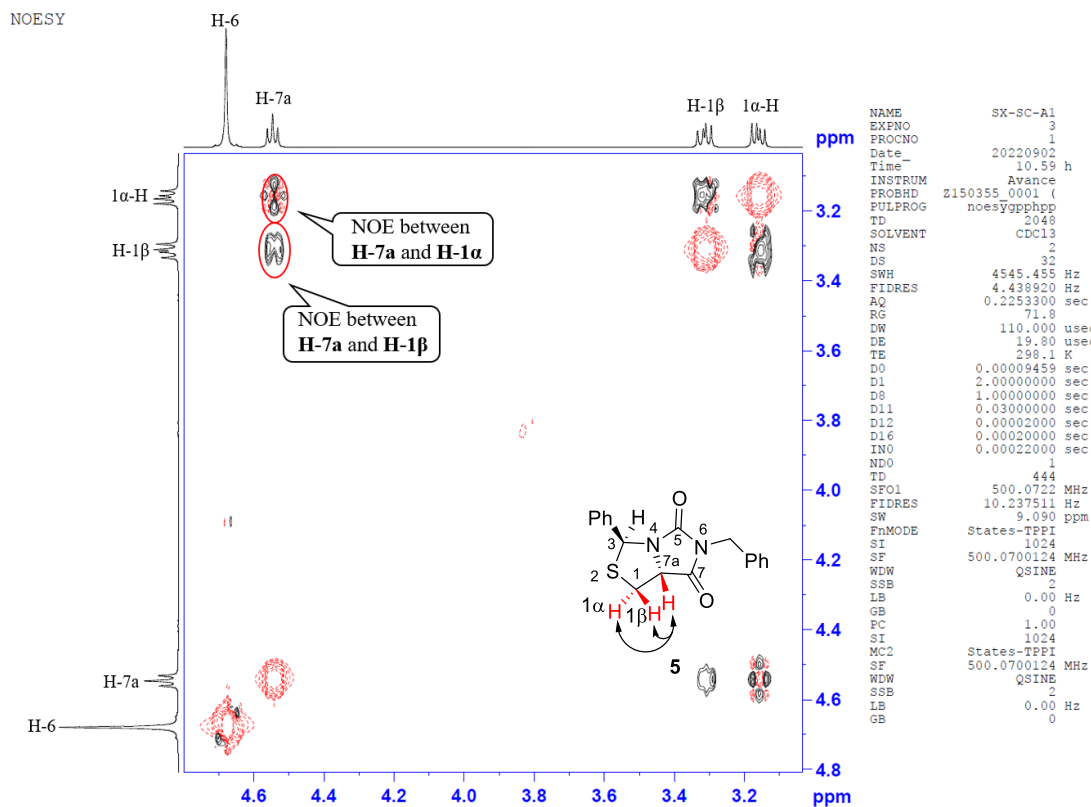

Figure S33.  $^1\text{H}$ - $^1\text{H}$  NOESY spectrum of compound **5**

# $^1\text{H}$ - $^1\text{H}$ COSY and $^1\text{H}$ - $^1\text{H}$ NOESY Spectra of Compound 9

COSY

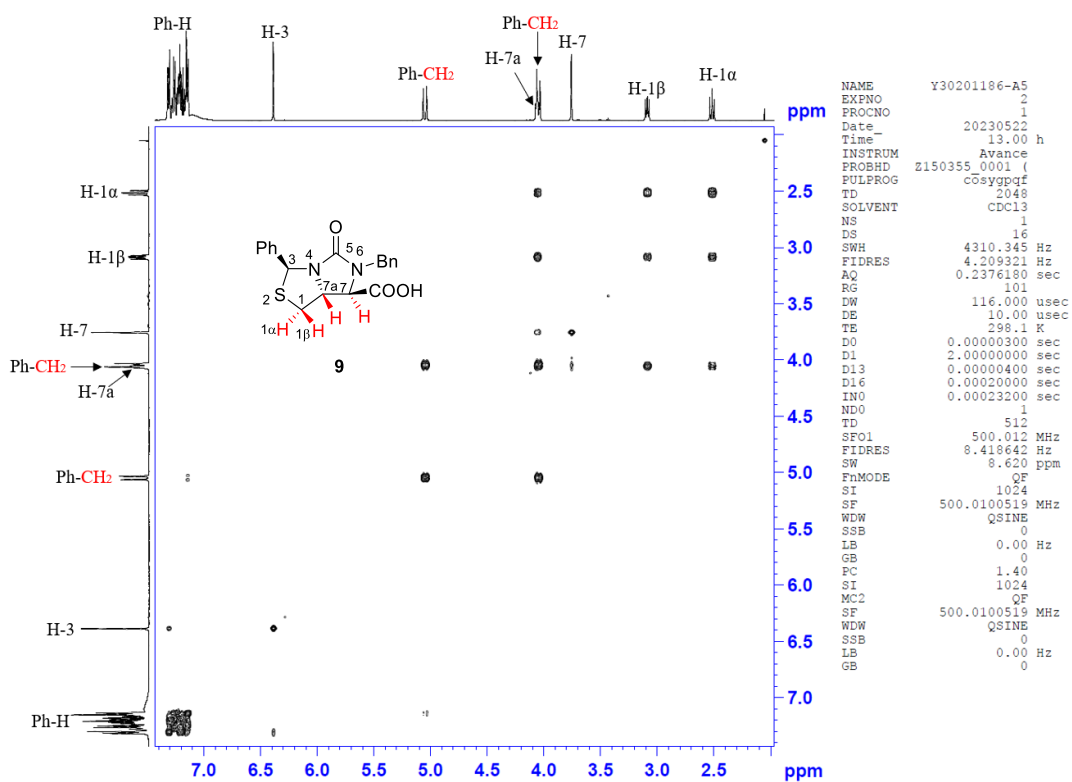

COSY

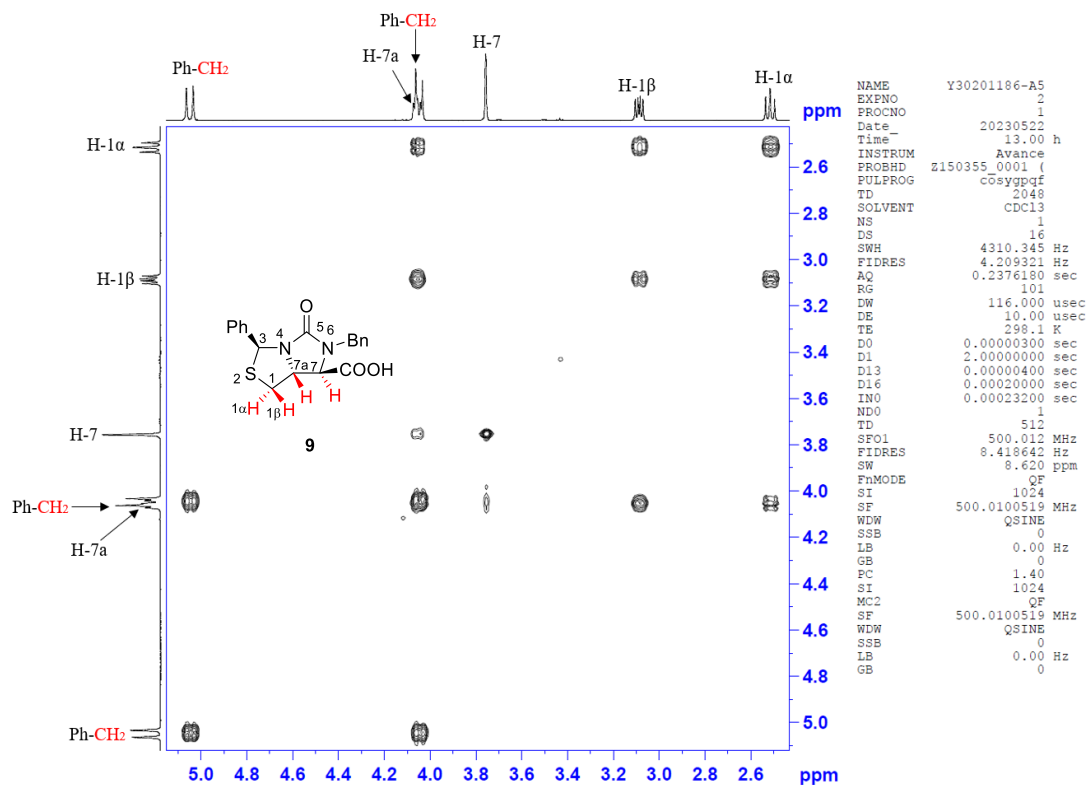

Figure S34.  $^1\text{H}$ - $^1\text{H}$  COSY spectrum of compound 9

NOESY

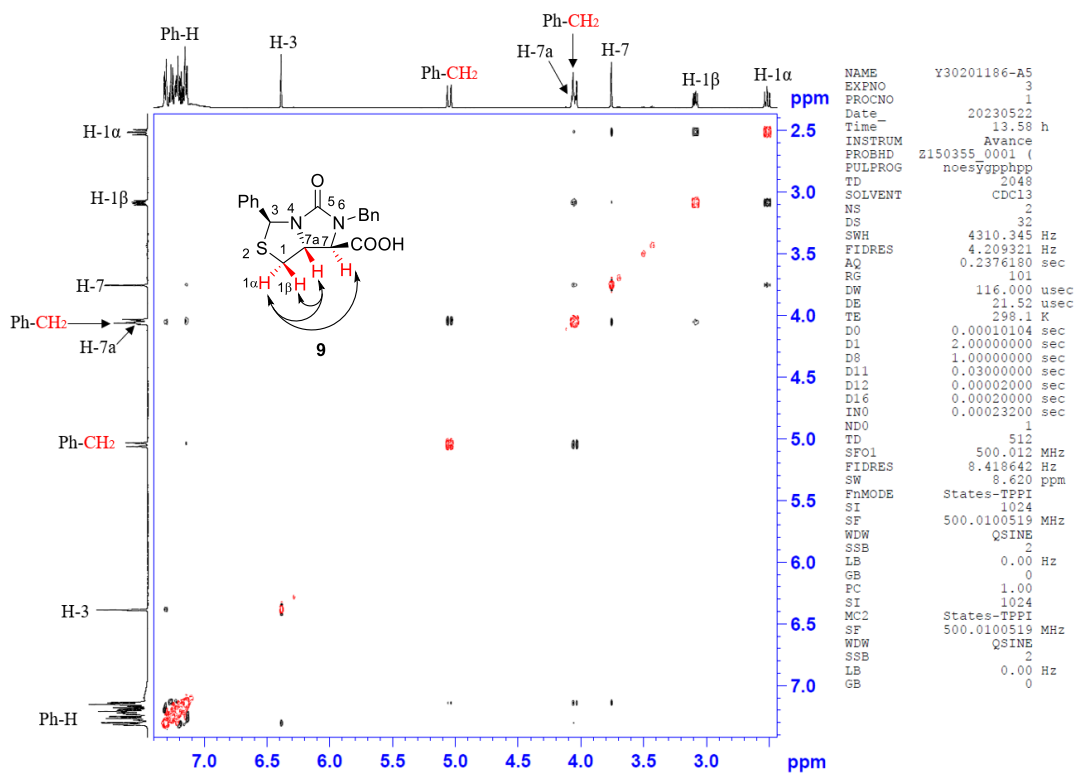

NOESY

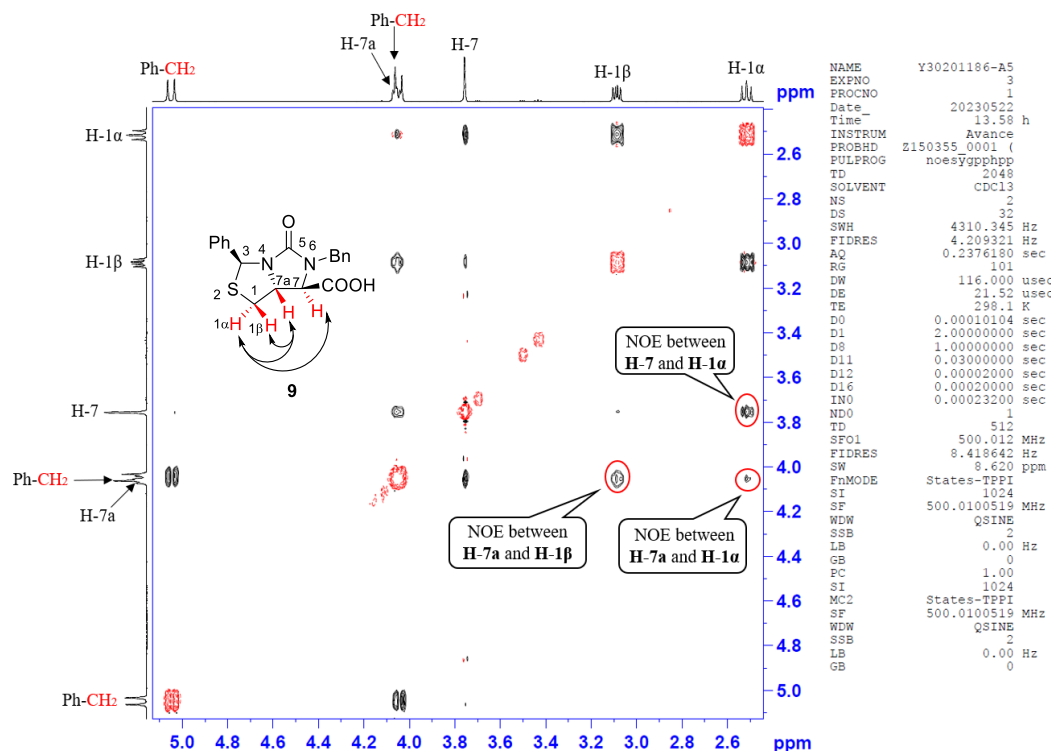

Figure S35. <sup>1</sup>H-<sup>1</sup>H NOESY spectrum of compound 9

# $^1\text{H}$ - $^1\text{H}$ COSY and $^1\text{H}$ - $^1\text{H}$ NOESY Spectra of Compound *trans*-1

COSY

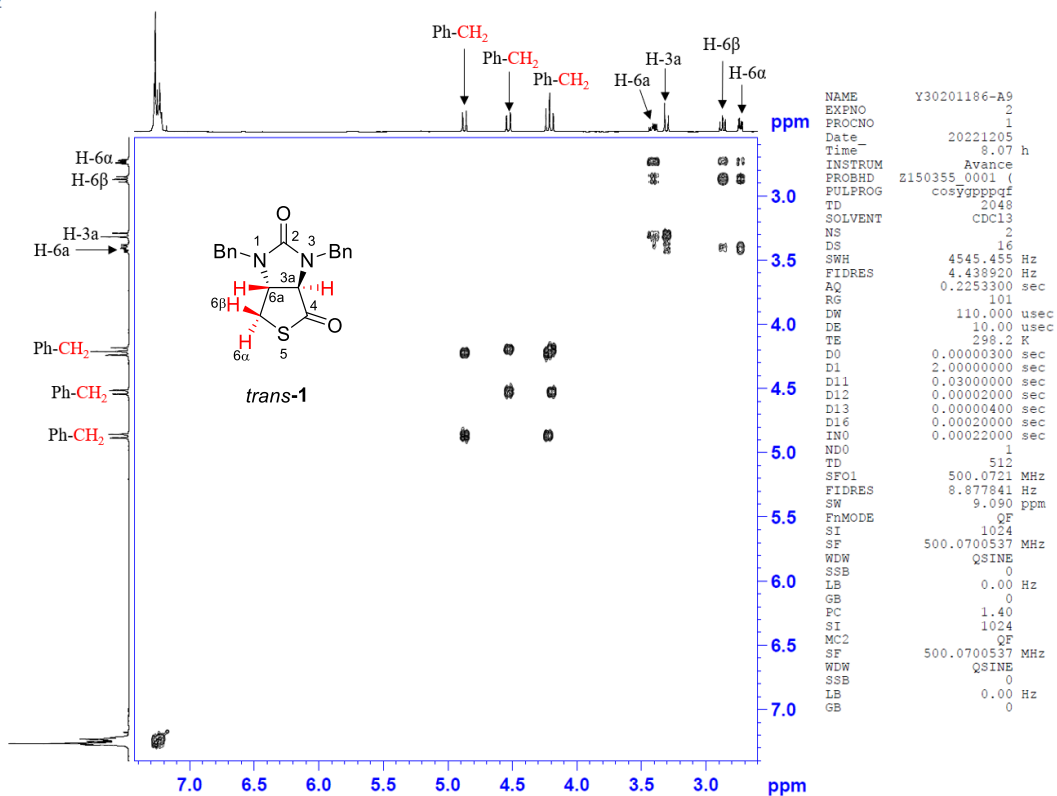

COSY

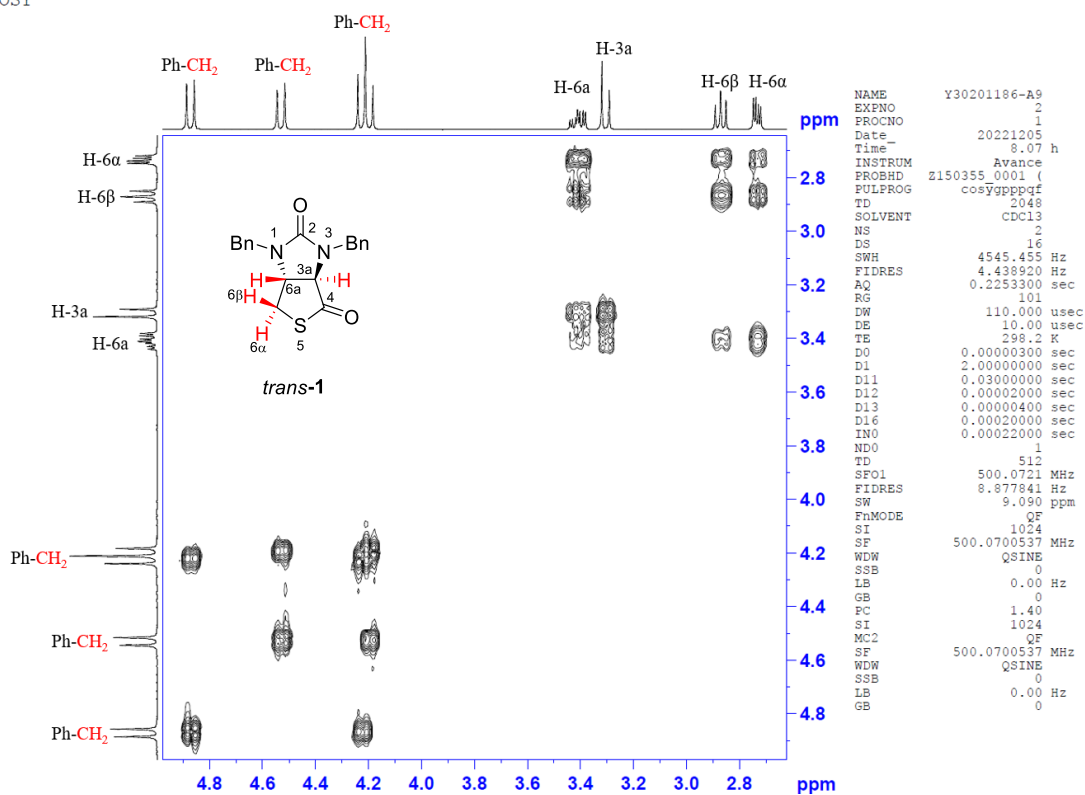

Figure S36.  $^1\text{H}$ - $^1\text{H}$  COSY spectrum of compound *trans*-1

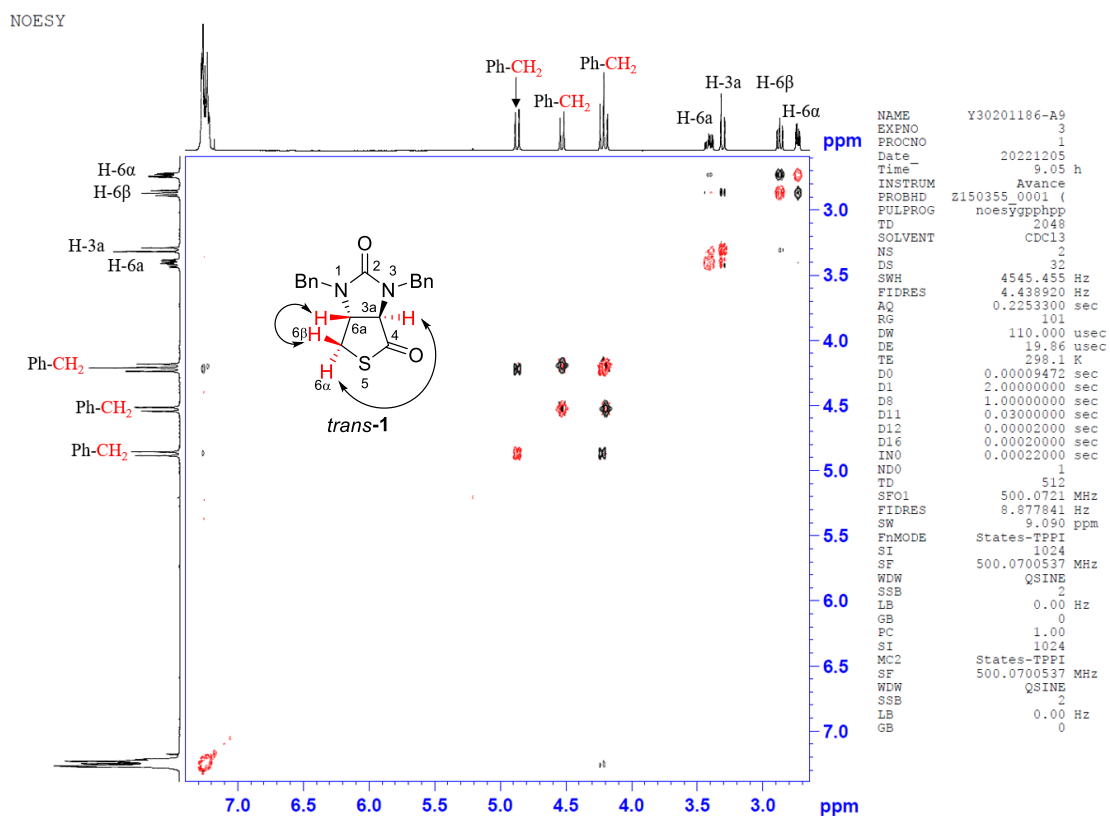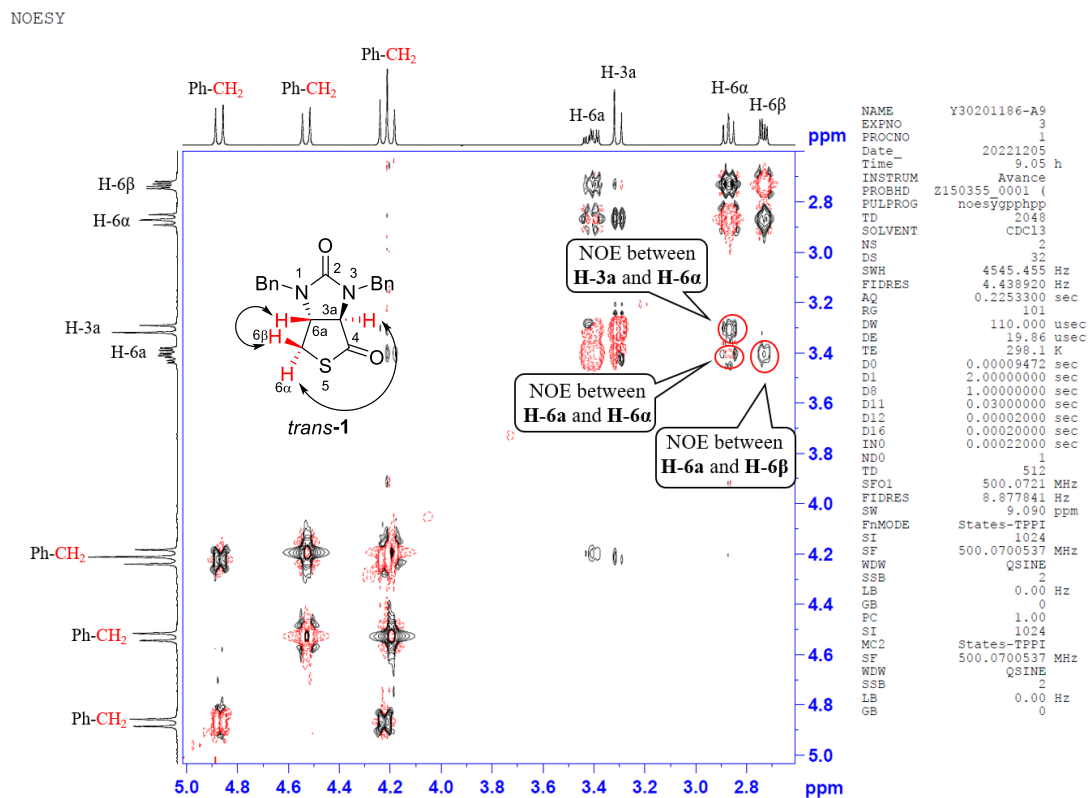

Figure S37.  $^1\text{H}$ - $^1\text{H}$  NOESY spectrum of compound *trans*-1

# $^1\text{H}$ - $^1\text{H}$ COSY and $^1\text{H}$ - $^1\text{H}$ NOESY Spectra of Compound *cis-1*

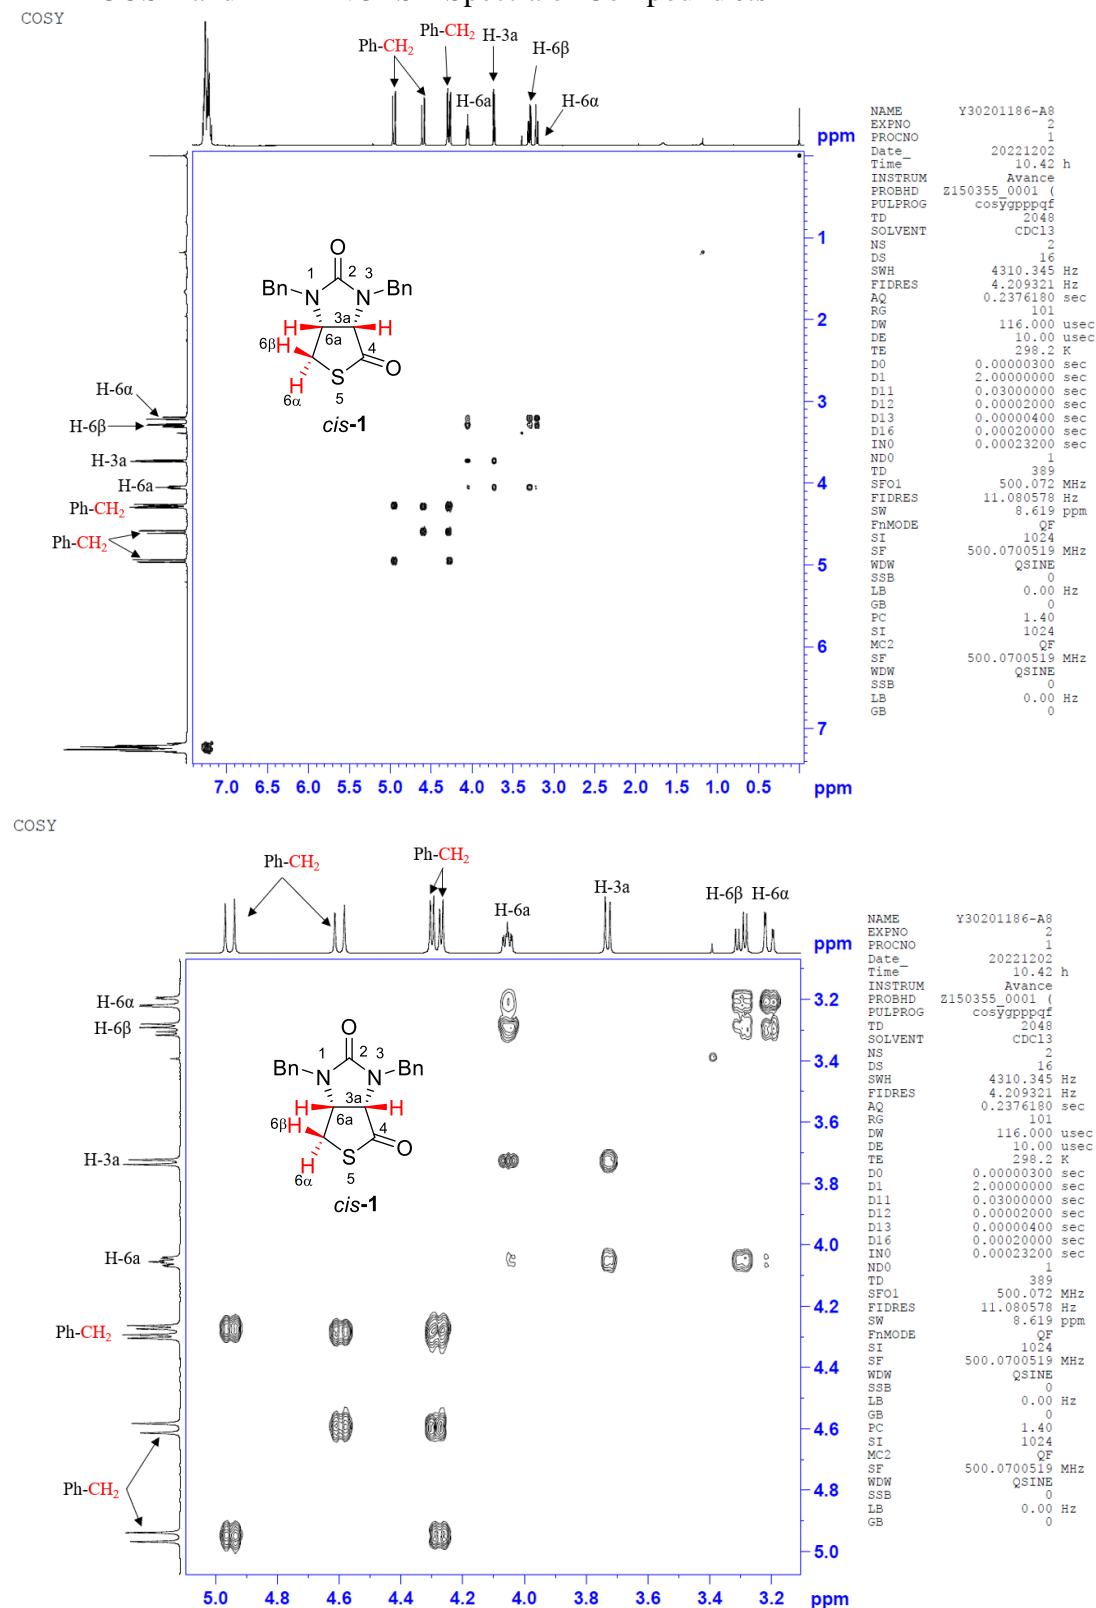

Figure S38.  $^1\text{H}$ - $^1\text{H}$  COSY spectrum of compound *cis-1*



NOESY

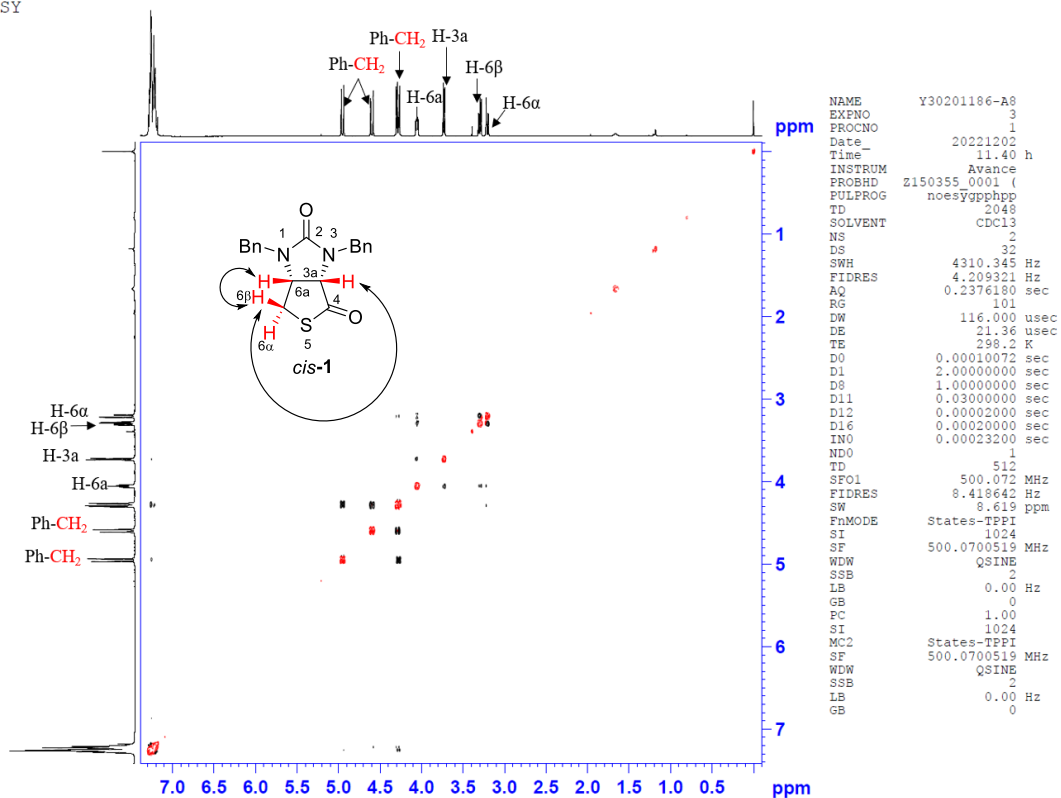

NOESY

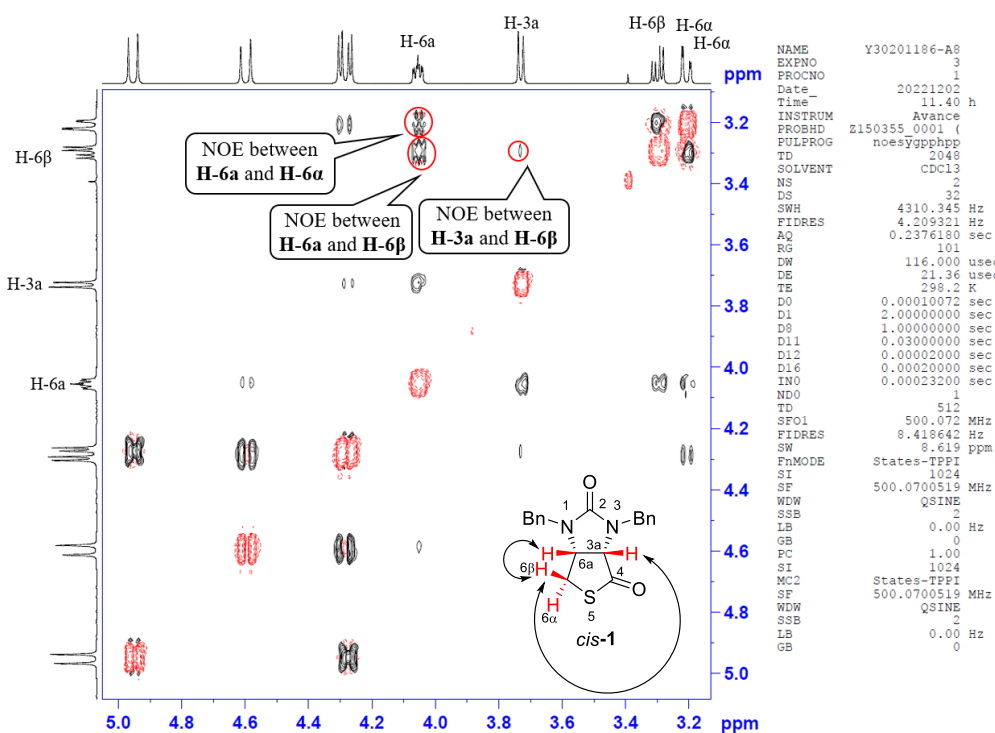

Figure S39.  $^1\text{H}$ - $^1\text{H}$  NOESY spectrum of compound *cis-1*

X-ray crystal structure and crystallographic data of compound *cis-1*:

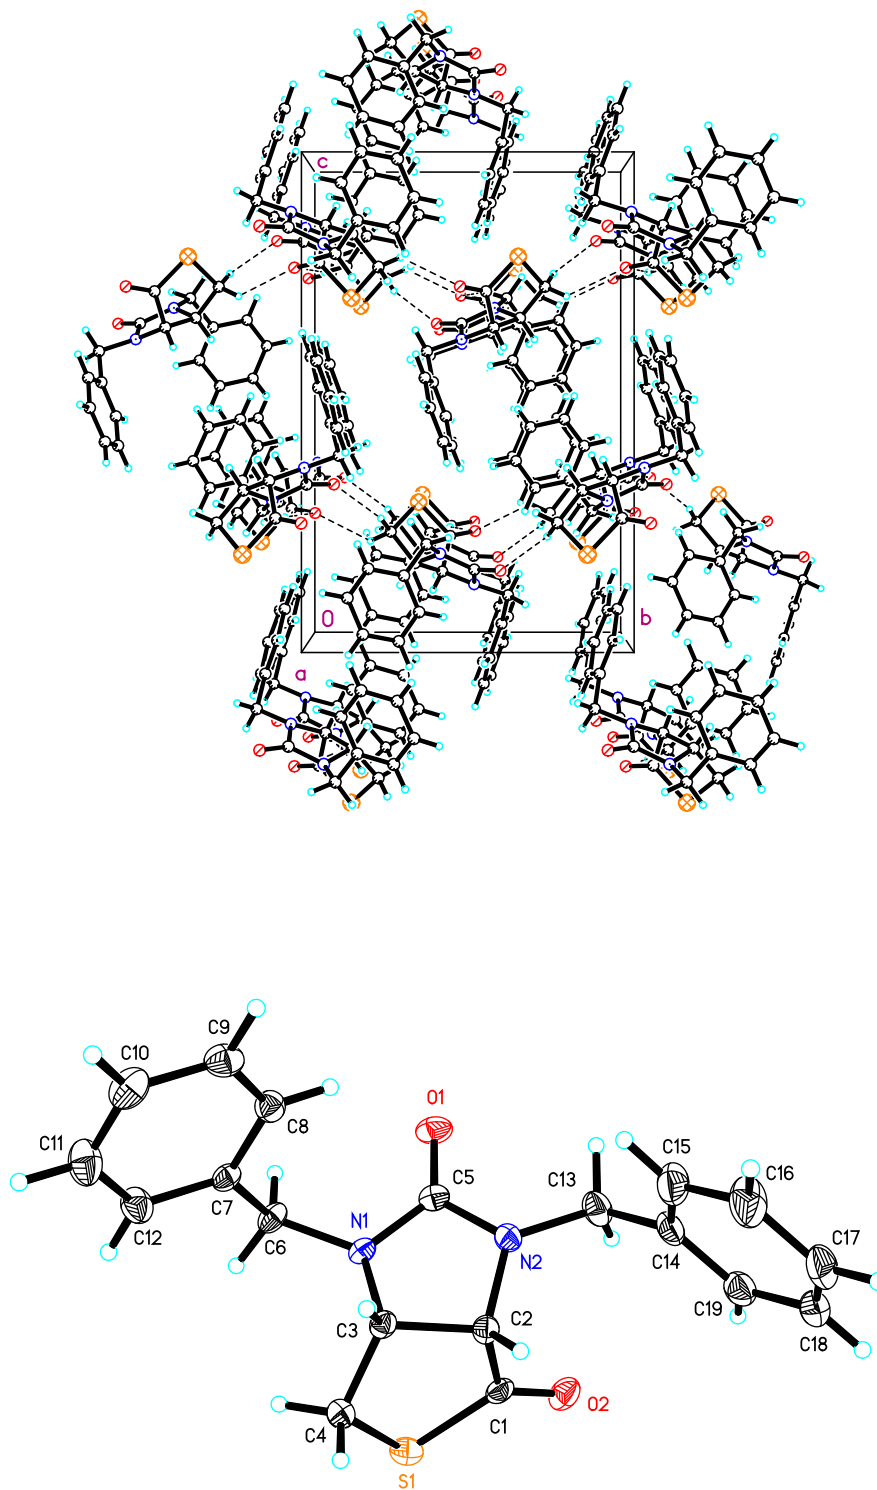

Figure S40. X-ray crystal structure of compound 1

Table 1. Crystal data and structure refinement for mo\_d8v23078\_0m

Identification code mo\_d8v23078\_0m  
 Empirical formula C<sub>19</sub>H<sub>18</sub>N<sub>2</sub>O<sub>2</sub>S  
 Formula weight 338.41  
 Temperature 213(2) K  
 Wavelength 0.71073 Å  
 Crystal system Orthorhombic  
 Space group P 21 21 21  
 Unit cell dimensions a = 7.8298(4) Å a = 90°.  
                           b = 11.9363(7) Å b = 90°.  
                           c = 17.9486(9) Å g = 90°.  
 Volume 1677.46(16) Å<sup>3</sup>  
 Z 4  
 Density (calculated) 1.340 Mg/m<sup>3</sup>  
 Absorption coefficient 0.206 mm<sup>-1</sup>  
 F(000) 712  
 Crystal size 0.180 x 0.150 x 0.120 mm<sup>3</sup>  
 Theta range for data collection 2.838 to 25.994°.  
 Index ranges -9<=h<=9, -10<=k<=14, -22<=l<=21  
 Reflections collected 8352  
 Independent reflections 3278 [R(int) = 0.0416]  
 Completeness to theta = 25.242° 98.9 %  
 Absorption correction Semi-empirical from equivalents  
 Max. and min. transmission 0.7456 and 0.5072  
 Refinement method Full-matrix least-squares on F<sup>2</sup>  
 Data / restraints / parameters 3278 / 0 / 218  
 Goodness-of-fit on F<sup>2</sup> 1.044  
 Final R indices [I>2sigma(I)] R1 = 0.0321, wR2 = 0.0810  
 R indices (all data) R1 = 0.0346, wR2 = 0.0833  
 Absolute structure parameter 0.02(4)  
 Extinction coefficient 0.080(8)  
 Largest diff. peak and hole 0.161 and -0.210 e.Å<sup>-3</sup>

Table 2. Atomic coordinates ( $\times 10^4$ ) and equivalent isotropic displacement parameters ( $\text{\AA}^2 \times 10^3$ ) for mo\_d8v23078\_0m.  $U(\text{eq})$  is defined as one third of the trace of the orthogonalized  $U_{ij}$  tensor.

---

|       | x        | y       | z       | U(eq) |
|-------|----------|---------|---------|-------|
| S(1)  | 9060(1)  | 6530(1) | 7934(1) | 45(1) |
| O(1)  | 4908(2)  | 4027(1) | 6640(1) | 43(1) |
| O(2)  | 10449(2) | 4769(1) | 7302(1) | 44(1) |
| N(1)  | 5695(2)  | 5838(1) | 6955(1) | 28(1) |
| N(2)  | 7491(2)  | 4805(1) | 6286(1) | 32(1) |
| C(1)  | 9488(3)  | 5549(2) | 7225(1) | 32(1) |
| C(2)  | 8446(3)  | 5789(2) | 6517(1) | 29(1) |
| C(3)  | 7036(2)  | 6614(2) | 6729(1) | 28(1) |
| C(4)  | 7667(3)  | 7368(2) | 7353(1) | 40(1) |
| C(5)  | 5913(3)  | 4804(2) | 6630(1) | 30(1) |
| C(6)  | 4014(3)  | 6229(2) | 7187(1) | 33(1) |
| C(7)  | 3073(2)  | 6884(2) | 6594(1) | 28(1) |
| C(8)  | 2833(3)  | 6433(2) | 5889(1) | 34(1) |
| C(9)  | 1932(3)  | 7018(2) | 5352(1) | 41(1) |
| C(10) | 1248(3)  | 8048(2) | 5513(1) | 47(1) |
| C(11) | 1458(4)  | 8504(2) | 6211(2) | 53(1) |
| C(12) | 2382(3)  | 7925(2) | 6750(1) | 42(1) |
| C(13) | 8283(3)  | 3755(2) | 6034(2) | 43(1) |
| C(14) | 9510(3)  | 3947(2) | 5401(1) | 40(1) |
| C(15) | 8938(4)  | 4331(3) | 4715(1) | 56(1) |
| C(16) | 10045(4) | 4499(3) | 4133(2) | 67(1) |
| C(17) | 11764(4) | 4270(3) | 4220(2) | 60(1) |
| C(18) | 12350(4) | 3879(2) | 4893(2) | 53(1) |
| C(19) | 11234(3) | 3723(2) | 5482(2) | 45(1) |

---

Table 3. Bond lengths [ $\text{\AA}$ ] and angles [ $^\circ$ ] for mo\_d8v23078\_0m.

---

|              |          |
|--------------|----------|
| S(1)-C(1)    | 1.762(2) |
| S(1)-C(4)    | 1.810(2) |
| O(1)-C(5)    | 1.217(2) |
| O(2)-C(1)    | 1.205(3) |
| N(1)-C(5)    | 1.376(3) |
| N(1)-C(6)    | 1.457(3) |
| N(1)-C(3)    | 1.459(3) |
| N(2)-C(5)    | 1.381(3) |
| N(2)-C(2)    | 1.453(3) |
| N(2)-C(13)   | 1.469(3) |
| C(1)-C(2)    | 1.537(3) |
| C(2)-C(3)    | 1.528(3) |
| C(2)-H(2)    | 0.9900   |
| C(3)-C(4)    | 1.520(3) |
| C(3)-H(3)    | 0.9900   |
| C(4)-H(4A)   | 0.9800   |
| C(4)-H(4B)   | 0.9800   |
| C(6)-C(7)    | 1.513(3) |
| C(6)-H(6A)   | 0.9800   |
| C(6)-H(6B)   | 0.9800   |
| C(7)-C(12)   | 1.383(3) |
| C(7)-C(8)    | 1.389(3) |
| C(8)-C(9)    | 1.383(3) |
| C(8)-H(8)    | 0.9400   |
| C(9)-C(10)   | 1.372(4) |
| C(9)-H(9)    | 0.9400   |
| C(10)-C(11)  | 1.376(4) |
| C(10)-H(10)  | 0.9400   |
| C(11)-C(12)  | 1.391(4) |
| C(11)-H(11)  | 0.9400   |
| C(12)-H(12)  | 0.9400   |
| C(13)-C(14)  | 1.506(4) |
| C(13)-H(13A) | 0.9800   |
| C(13)-H(13B) | 0.9800   |
| C(14)-C(19)  | 1.384(4) |
| C(14)-C(15)  | 1.387(4) |
| C(15)-C(16)  | 1.373(4) |
| C(15)-H(15)  | 0.9400   |
| C(16)-C(17)  | 1.383(4) |
| C(16)-H(16)  | 0.9400   |
| C(17)-C(18)  | 1.373(4) |
| C(17)-H(17)  | 0.9400   |

|                  |            |
|------------------|------------|
| C(18)-C(19)      | 1.385(4)   |
| C(18)-H(18)      | 0.9400     |
| C(19)-H(19)      | 0.9400     |
|                  |            |
| C(1)-S(1)-C(4)   | 93.79(11)  |
| C(5)-N(1)-C(6)   | 121.38(18) |
| C(5)-N(1)-C(3)   | 111.22(16) |
| C(6)-N(1)-C(3)   | 121.74(16) |
| C(5)-N(2)-C(2)   | 109.45(17) |
| C(5)-N(2)-C(13)  | 120.93(18) |
| C(2)-N(2)-C(13)  | 124.05(18) |
| O(2)-C(1)-C(2)   | 124.8(2)   |
| O(2)-C(1)-S(1)   | 123.31(18) |
| C(2)-C(1)-S(1)   | 111.84(15) |
| N(2)-C(2)-C(3)   | 102.74(16) |
| N(2)-C(2)-C(1)   | 111.05(17) |
| C(3)-C(2)-C(1)   | 107.37(17) |
| N(2)-C(2)-H(2)   | 111.8      |
| C(3)-C(2)-H(2)   | 111.8      |
| C(1)-C(2)-H(2)   | 111.8      |
| N(1)-C(3)-C(4)   | 113.86(17) |
| N(1)-C(3)-C(2)   | 100.35(16) |
| C(4)-C(3)-C(2)   | 109.29(17) |
| N(1)-C(3)-H(3)   | 111.0      |
| C(4)-C(3)-H(3)   | 111.0      |
| C(2)-C(3)-H(3)   | 111.0      |
| C(3)-C(4)-S(1)   | 107.05(15) |
| C(3)-C(4)-H(4A)  | 110.3      |
| S(1)-C(4)-H(4A)  | 110.3      |
| C(3)-C(4)-H(4B)  | 110.3      |
| S(1)-C(4)-H(4B)  | 110.3      |
| H(4A)-C(4)-H(4B) | 108.6      |
| O(1)-C(5)-N(1)   | 126.7(2)   |
| O(1)-C(5)-N(2)   | 125.9(2)   |
| N(1)-C(5)-N(2)   | 107.48(17) |
| N(1)-C(6)-C(7)   | 113.90(17) |
| N(1)-C(6)-H(6A)  | 108.8      |
| C(7)-C(6)-H(6A)  | 108.8      |
| N(1)-C(6)-H(6B)  | 108.8      |
| C(7)-C(6)-H(6B)  | 108.8      |
| H(6A)-C(6)-H(6B) | 107.7      |
| C(12)-C(7)-C(8)  | 118.6(2)   |
| C(12)-C(7)-C(6)  | 120.88(19) |
| C(8)-C(7)-C(6)   | 120.44(19) |

C(9)-C(8)-C(7) 120.6(2)  
C(9)-C(8)-H(8) 119.7  
C(7)-C(8)-H(8) 119.7  
C(10)-C(9)-C(8) 120.3(2)  
C(10)-C(9)-H(9) 119.8  
C(8)-C(9)-H(9) 119.8  
C(9)-C(10)-C(11) 120.0(2)  
C(9)-C(10)-H(10) 120.0  
C(11)-C(10)-H(10) 120.0  
C(10)-C(11)-C(12) 119.9(2)  
C(10)-C(11)-H(11) 120.1  
C(12)-C(11)-H(11) 120.1  
C(7)-C(12)-C(11) 120.6(2)  
C(7)-C(12)-H(12) 119.7  
C(11)-C(12)-H(12) 119.7  
N(2)-C(13)-C(14) 111.80(19)  
N(2)-C(13)-H(13A) 109.3  
C(14)-C(13)-H(13A) 109.3  
N(2)-C(13)-H(13B) 109.3  
C(14)-C(13)-H(13B) 109.3  
H(13A)-C(13)-H(13B) 107.9  
C(19)-C(14)-C(15) 118.2(2)  
C(19)-C(14)-C(13) 120.8(2)  
C(15)-C(14)-C(13) 120.9(2)  
C(16)-C(15)-C(14) 121.3(3)  
C(16)-C(15)-H(15) 119.3  
C(14)-C(15)-H(15) 119.3  
C(15)-C(16)-C(17) 119.9(3)  
C(15)-C(16)-H(16) 120.0  
C(17)-C(16)-H(16) 120.0  
C(18)-C(17)-C(16) 119.5(3)  
C(18)-C(17)-H(17) 120.2  
C(16)-C(17)-H(17) 120.2  
C(17)-C(18)-C(19) 120.4(3)  
C(17)-C(18)-H(18) 119.8  
C(19)-C(18)-H(18) 119.8  
C(14)-C(19)-C(18) 120.6(3)  
C(14)-C(19)-H(19) 119.7  
C(18)-C(19)-H(19) 119.7

---

Symmetry transformations used to generate equivalent atoms:

Table 4. Anisotropic displacement parameters ( $\text{\AA}^2 \times 10^3$ ) for mo\_d8v23078\_0m. The anisotropic

displacement factor exponent takes the form:  $-2p^2 [ h^2 a^*2U11 + \dots + 2 h k a^* b^* U12 ]$

|       | U11   | U22   | U33   | U23    | U13   | U12    |
|-------|-------|-------|-------|--------|-------|--------|
| S(1)  | 41(1) | 48(1) | 46(1) | -11(1) | -9(1) | -3(1)  |
| O(1)  | 39(1) | 36(1) | 54(1) | 5(1)   | -6(1) | -13(1) |
| O(2)  | 31(1) | 41(1) | 60(1) | 9(1)   | -1(1) | 5(1)   |
| N(1)  | 21(1) | 31(1) | 32(1) | 3(1)   | 1(1)  | -2(1)  |
| N(2)  | 32(1) | 26(1) | 38(1) | -3(1)  | 2(1)  | 0(1)   |
| C(1)  | 21(1) | 32(1) | 43(1) | 2(1)   | 3(1)  | -5(1)  |
| C(2)  | 28(1) | 25(1) | 35(1) | 2(1)   | 5(1)  | -1(1)  |
| C(3)  | 25(1) | 26(1) | 35(1) | 3(1)   | 3(1)  | -1(1)  |
| C(4)  | 34(1) | 31(1) | 54(1) | -8(1)  | 2(1)  | 0(1)   |
| C(5)  | 30(1) | 30(1) | 30(1) | 6(1)   | -4(1) | -3(1)  |
| C(6)  | 23(1) | 48(1) | 28(1) | 6(1)   | 3(1)  | 1(1)   |
| C(7)  | 21(1) | 37(1) | 27(1) | 3(1)   | 4(1)  | -3(1)  |
| C(8)  | 34(1) | 37(1) | 32(1) | -1(1)  | 2(1)  | 1(1)   |
| C(9)  | 44(1) | 52(2) | 29(1) | 1(1)   | -5(1) | -4(1)  |
| C(10) | 43(1) | 56(2) | 40(1) | 17(1)  | -5(1) | 6(1)   |
| C(11) | 63(2) | 46(1) | 49(1) | 5(1)   | 2(1)  | 18(1)  |
| C(12) | 50(1) | 44(1) | 33(1) | -5(1)  | 0(1)  | 7(1)   |
| C(13) | 52(1) | 29(1) | 49(1) | -4(1)  | 4(1)  | 5(1)   |
| C(14) | 47(1) | 32(1) | 40(1) | -11(1) | -2(1) | 10(1)  |
| C(15) | 50(2) | 79(2) | 41(1) | -14(1) | -2(1) | 21(2)  |
| C(16) | 70(2) | 99(3) | 33(1) | -9(2)  | 3(1)  | 23(2)  |
| C(17) | 59(2) | 75(2) | 44(1) | -22(1) | 11(1) | 10(2)  |
| C(18) | 43(1) | 52(2) | 62(2) | -22(1) | -1(1) | 10(1)  |
| C(19) | 49(1) | 37(1) | 49(1) | -8(1)  | -6(1) | 9(1)   |



Table 5. Hydrogen coordinates ( x 104) and isotropic displacement parameters ( $\text{\AA}^2 \times 10^3$ ) for mo\_d8v23078\_0m.

---

|        | x     | y    | z    | U(eq) |
|--------|-------|------|------|-------|
| H(2)   | 9173  | 6083 | 6110 | 35    |
| H(3)   | 6674  | 7062 | 6292 | 34    |
| H(4A)  | 6700  | 7650 | 7645 | 48    |
| H(4B)  | 8291  | 8009 | 7148 | 48    |
| H(6A)  | 4145  | 6703 | 7629 | 39    |
| H(6B)  | 3320  | 5580 | 7329 | 39    |
| H(8)   | 3287  | 5724 | 5775 | 41    |
| H(9)   | 1787  | 6708 | 4875 | 50    |
| H(10)  | 637   | 8443 | 5146 | 56    |
| H(11)  | 977   | 9205 | 6324 | 63    |
| H(12)  | 2539  | 8243 | 7224 | 51    |
| H(13A) | 7388  | 3234 | 5874 | 52    |
| H(13B) | 8894  | 3411 | 6452 | 52    |
| H(15)  | 7768  | 4479 | 4648 | 68    |
| H(16)  | 9634  | 4770 | 3675 | 81    |
| H(17)  | 12527 | 4381 | 3822 | 71    |
| H(18)  | 13517 | 3716 | 4953 | 63    |
| H(19)  | 11651 | 3462 | 5942 | 54    |

---

Table 6. Torsion angles [°] for mo\_d8v23078\_0m.

---

|                        |             |
|------------------------|-------------|
| C(4)-S(1)-C(1)-O(2)    | 177.68(19)  |
| C(4)-S(1)-C(1)-C(2)    | -4.31(16)   |
| C(5)-N(2)-C(2)-C(3)    | -25.5(2)    |
| C(13)-N(2)-C(2)-C(3)   | -179.2(2)   |
| C(5)-N(2)-C(2)-C(1)    | 89.1(2)     |
| C(13)-N(2)-C(2)-C(1)   | -64.7(3)    |
| O(2)-C(1)-C(2)-N(2)    | 51.7(3)     |
| S(1)-C(1)-C(2)-N(2)    | -126.26(16) |
| O(2)-C(1)-C(2)-C(3)    | 163.30(19)  |
| S(1)-C(1)-C(2)-C(3)    | -14.7(2)    |
| C(5)-N(1)-C(3)-C(4)    | -140.47(18) |
| C(6)-N(1)-C(3)-C(4)    | 65.7(2)     |
| C(5)-N(1)-C(3)-C(2)    | -23.9(2)    |
| C(6)-N(1)-C(3)-C(2)    | -177.64(17) |
| N(2)-C(2)-C(3)-N(1)    | 28.4(2)     |
| C(1)-C(2)-C(3)-N(1)    | -88.76(18)  |
| N(2)-C(2)-C(3)-C(4)    | 148.38(18)  |
| C(1)-C(2)-C(3)-C(4)    | 31.2(2)     |
| N(1)-C(3)-C(4)-S(1)    | 77.00(19)   |
| C(2)-C(3)-C(4)-S(1)    | -34.3(2)    |
| C(1)-S(1)-C(4)-C(3)    | 22.10(16)   |
| C(6)-N(1)-C(5)-O(1)    | -17.0(3)    |
| C(3)-N(1)-C(5)-O(1)    | -170.9(2)   |
| C(6)-N(1)-C(5)-N(2)    | 163.02(17)  |
| C(3)-N(1)-C(5)-N(2)    | 9.1(2)      |
| C(2)-N(2)-C(5)-O(1)    | -168.8(2)   |
| C(13)-N(2)-C(5)-O(1)   | -14.1(3)    |
| C(2)-N(2)-C(5)-N(1)    | 11.1(2)     |
| C(13)-N(2)-C(5)-N(1)   | 165.82(19)  |
| C(5)-N(1)-C(6)-C(7)    | -91.1(2)    |
| C(3)-N(1)-C(6)-C(7)    | 60.1(2)     |
| N(1)-C(6)-C(7)-C(12)   | -128.7(2)   |
| N(1)-C(6)-C(7)-C(8)    | 53.6(3)     |
| C(12)-C(7)-C(8)-C(9)   | 0.5(3)      |
| C(6)-C(7)-C(8)-C(9)    | 178.2(2)    |
| C(7)-C(8)-C(9)-C(10)   | -0.7(4)     |
| C(8)-C(9)-C(10)-C(11)  | 0.0(4)      |
| C(9)-C(10)-C(11)-C(12) | 0.9(4)      |
| C(8)-C(7)-C(12)-C(11)  | 0.3(3)      |
| C(6)-C(7)-C(12)-C(11)  | -177.3(2)   |
| C(10)-C(11)-C(12)-C(7) | -1.0(4)     |
| C(5)-N(2)-C(13)-C(14)  | 154.2(2)    |

C(2)-N(2)-C(13)-C(14) -54.9(3)  
N(2)-C(13)-C(14)-C(19) 116.4(3)  
N(2)-C(13)-C(14)-C(15) -65.0(3)  
C(19)-C(14)-C(15)-C(16) -0.8(4)  
C(13)-C(14)-C(15)-C(16) -179.5(3)  
C(14)-C(15)-C(16)-C(17) 0.9(5)  
C(15)-C(16)-C(17)-C(18) -0.2(6)  
C(16)-C(17)-C(18)-C(19) -0.5(5)  
C(15)-C(14)-C(19)-C(18) 0.0(4)  
C(13)-C(14)-C(19)-C(18) 178.7(2)  
C(17)-C(18)-C(19)-C(14) 0.7(4)

---

Symmetry transformations used to generate equivalent atoms:

Table 7. Hydrogen bonds for mo\_d8v23078\_0m [ $\text{\AA}$  and  $^\circ$ ].

| D-H...A               | d(D-H) | d(H...A) | d(D...A) | $\angle(\text{DHA})$ |
|-----------------------|--------|----------|----------|----------------------|
| C(13)-H(13B)...O(2)   | 0.98   | 2.54     | 3.085(3) | 115.2                |
| C(13)-H(13B)...S(1)#1 | 0.98   | 2.97     | 3.849(3) | 149.8                |
| C(6)-H(6B)...O(2)#2   | 0.98   | 2.45     | 3.297(3) | 144.8                |
| C(4)-H(4B)...O(2)#3   | 0.98   | 2.52     | 3.282(3) | 134.3                |
| C(4)-H(4A)...O(1)#4   | 0.98   | 2.44     | 3.354(3) | 155.9                |

Symmetry transformations used to generate equivalent atoms:

#1  $-x+2, y-1/2, -z+3/2$     #2  $x-1, y, z$     #3  $-x+2, y+1/2, -z+3/2$

#4  $-x+1, y+1/2, -z+3/2$
